# Supplementary material
Source: Elsevier journal article supplement (https://www.sciencedirect.com/science/article/pii/S1699258X12001349)
Supplement: mmc1 [file S1699258X12001349:mmc1.docx]

MATERIAL SUPLEMENTARIO: REVISIONES SISTEMÁTICAS

[Suspensión progresiva de abatacept en pacientes con artritis reumatoide 2](#_Toc317048214)

[Justificación 2](#_Toc317048215)

[Métodos 2](#_Toc317048216)

[Resultados 3](#_Toc317048217)

[Discusión 3](#_Toc317048218)

[Datos de eficacia a largo plazo de abatacept en artritis reumatoide en registros 4](#_Toc317048219)

[Justificación 4](#_Toc317048220)

[Métodos 4](#_Toc317048221)

[Resultados 6](#_Toc317048222)

[Discusión 10](#_Toc317048223)

[Comparación de abatacept con otros biológicos en artritis reumatoide 11](#_Toc317048224)

[Justificación 11](#_Toc317048225)

[Métodos 11](#_Toc317048226)

[Resultados 13](#_Toc317048227)

[Discusión 19](#_Toc317048228)

[Conclusión 19](#_Toc317048229)

[Infecciones en pacientes con artritis reumatoide en tratamiento con abatacept 21](#_Toc317048230)

[Justificación 21](#_Toc317048231)

[Métodos 21](#_Toc317048232)

[Resultados 23](#_Toc317048233)

[Discusión 34](#_Toc317048234)

[Referencias 35](#_Toc317048235)

# Suspensión progresiva de abatacept en pacientes con artritis reumatoide

**Revisora:** Chamaida Plasencia Rodríguez

**Supervisora:** Loreto Carmona

## Justificación

Es importante responder esta pregunta para evaluar si existe evidencia sobre la suspensión progresiva del tratamiento con abatacept en pacientes con artritis reumatoide en remisión.

## Métodos

Las estrategias de búsqueda utilizadas se realizaron como se muestra en la Tabla 1. Se corrieron las búsquedas en Medline (PubMed) y embase, así como en los resúmenes de los congresos europeo y americano de reumatología desde 2004. Las citas encontradas fueron exportadas a un gestor de referencias bibliográficas, donde se excluyeron las que estaban duplicadas. A continuación, tras la lectura de títulos y *abstract*, se excluyeron los artículos no relacionados con el tema de investigación. Se excluyeron además todos los estudios: 1) No realizados en humanos, 2) pacientes < 18 años, 3) patologías que no fueran artritis reumatoide, excluyendo incluso las publicaciones en artritis de inicio, 4) Casos clínicos o series de casos y 5) idioma distinto al inglés o español

**Tabla 1.** Estrategias de búsqueda en las diferentes bases de datos bibliográficas

| **#** | **Términos** | **Resultados** |
| --- | --- | --- |
| **Medline (12/06/11)** | | |
| 1 | abatacept OR BELATACEPT OR LEA29Y OR BMS224818 OR BMS-224818 OR CTLA-4-Ig OR cytotoxic T lymphocyte-associated antigen 4-immunoglobulin OR CTLA4-Ig immunoconjugate OR CTLA4-Fc OR CTLA4-Ig OR Orencia OR BMS 188667 OR BMS-188667 | 2277 |
| 2 | rheumatoid arthritis or arthritis rheumatoid | 107207 |
| 3 | Kaplan meier or Kaplan or Kaplan meier survival or drug surveillance or drug survival or stop drug or stopping drug or dose decrease or lowering dose or low dose or dose escalation or discontinuation or discontinuation therapy | 732655 |
| 4 | 1+2+3 | 55 |
| 5 | Limits: Humans | 52 |
| **Embase (12/06/11)** | | |
| 1 | abatacept OR BELATACEPT OR LEA29Y OR BMS224818 OR BMS-224818 OR CTLA-4-Ig OR cytotoxic T lymphocyte-associated antigen 4-immunoglobulin OR CTLA4-Ig immunoconjugate OR CTLA4-Fc OR CTLA4-Ig OR Orencia OR BMS 188667 OR BMS-188667 | 2.974 |
| 2 | rheumatoid arthritis or arthritis rheumatoid | 133.206 |
| 3 | Kaplan meier method OR drug dose escalation OR dose decrease OR therapy discontinuation OR therapy stopping OR survival analysis OR drug surveillance | 996.074 |
| 4 | Limits: Humans | 193 |
| **ACR** | | |
| 1 | abatacept+ suspensión + AR | 3 |
| **EULAR** | | |
| 1 | Abatacept AND rheumatoid arthritis AND stop therapy | 0 |
| 2 | Abatacept AND rheumatoid arthritis AND dose escalation | 2 |
| 3 | Abatacept AND rheumatoid arthritis AND discontinuation | 22 |
| 4 | Abatacept AND rheumatoid arthritis AND Kaplan Meier | 0 |
| 5 | Abatacept AND rheumatoid arthritis AND survivial: | 9 |

## Resultados

Los resultados de las estrategias de búsqueda se presentan en la **Tabla 1**, donde se dividen las búsquedas según lo obtenido en: Medline (Pubmed), Embase y resúmenes de EULAR y ACR. Un total de 281 publicaciones, incluyendo los resúmenes de congresos fueron descartadas tras la lectura del título o *abstract*.

## Discusión

No hemos encontrado ningún artículo o *abstract* relacionado con el tema. Uno de los estudios excluidos fue un ensayo clínico de 112 pacientes con artritis idiopática juvenil que habían respondido a abatacept y a los que a la mitad de ellos de forma aleatoria se les retiró abatacept durante 6 meses ([1](#_ENREF_1), [2](#_ENREF_2)). La suspensión condujo al rebrote de la artritis en el 53% de los niños mientras que en los que continuaron el 20% rebrotó (*p*<0,001)([1](#_ENREF_1)). Tras la reintroducción de abatacept en aquellos en los que se había suspendido, se consiguieron respuestas clínicas similares a las de los que habían sido tratados de forma continua, con un 75% de los niños alcanzando un Pedi 75 ([2](#_ENREF_2)). Ninguno presentó reacciones a la perfusión al reiniciar el tratamiento con abatacept. Puesto que los ensayos clínicos en niños siguen este diseño, que es ajeno a la AR, no lo hemos considerado incluible.

No podemos emitir pues ninguna conclusión respecto a la suspensión de abatacept.

# Datos de eficacia a largo plazo de abatacept en artritis reumatoide en registros

**Revisora:** Leticia Lojo Oliveira

**Supervisora:** Loreto Carmona

## Justificación

La artritis reumatoide es una enfermedad inflamatoria crónica que produce discapacidad y reduce la calidad de vida de los pacientes. Durante la última década el uso de los fármacos biológicos, en especial los inhibidores del TNF, ha cambiado el curso de esta enfermedad. En los últimos años se introdujeron nuevos fármacos con dianas terapéuticas distintas al TNF entre los que se encuentra el abatacept. La eficacia de abatacept ha sido demostrada en ensayos clínicos aleatorizados, pero los datos de eficacia en la práctica clínica son más escasos.

El objetivo de esta revisión es extraer de la literatura publicada sobre abatacept los datos de eficacia a largo plazo en la práctica clínica habitual.

## Métodos

Se realizó una búsqueda sensible en Medline a través de Pubmed y en Embase directamente en su servidor con objeto de capturara todos los registros y estudios observacionales de pacientes con artritis reumatoide tratados con abatacept. Ambas búsquedas se realizaron el día 3/6/11 (**Tabla 2**). Con posterioridad se fijó una alerta en Pubmed para artículos más recientes. Se revisaron *abstracts* de los congresos EULAR y ACR desde 2005.

Se seleccionaron todos los estudios sobre registros que trataran sobre la efectividad a largo plazo, actividad, radiología, efectividad tras *switch* y calidad de vida en pacientes con artritis reumatoide en tratamiento con abatacept. Se excluyeron pacientes con artritis de inicio y ensayos clínicos. La búsqueda se limitó a estudios en inglés, español, portugués, italiano o francés, y en humanos.

La calidad de los estudios incluidos se evaluó con la escala de New Castle-Ottawa para cohortes ([3](#_ENREF_3)).

**Tabla 2**. Estrategia de búsqueda

| **#** | **Frase de búsqueda** |
| --- | --- |
| **Pubmed** | |
| 1 | (rheumatoid arthritis OR arthritis, rheumatoid) |
| 2 | (abatacept OR BELATACEPT OR LEA29Y OR BMS224818 OR BMS-224818 OR CTLA-4-Ig OR cytotoxic T lymphocyte-associated antigen 4-immunoglobulin OR CTLA4-Ig immunoconjugate OR CTLA4-Fc OR CTLA4-Ig OR Orencia OR BMS 188667 OR BMS-188667) |
| 3 | (clinical practice OR physician's practice pattern OR physicians practice patterns OR practice pattern, physician's OR practice patterns, physician's OR clinical practice variations OR variations, clinical practice OR practice variations, clinical OR variation, clinical practice OR practice patterns, professional OR pattern, professional practice OR patterns, professional practice OR practice pattern, professional OR professional practice pattern OR professional practice patterns OR clinical practice pattern OR practice patterns, clinical OR patterns, clinical practice OR practice pattern, clinical OR clinical practice patterns OR pattern, clinical practice OR practice pattern variations OR practice pattern variation OR variation, practice pattern OR variations, practice pattern OR pattern, physician's practice OR patterns, physician's practice OR physician practice patterns OR real life OR characteristic, population OR characteristics, population OR population characteristic OR populations OR population OR cohort OR registry OR register OR registers OR registries OR population OR register OR population OR registers OR register, population OR database OR data base OR registration OR prescription practice) |
| 4 | 1 AND 2 AND 3 |
| **Embase** | |
| 1 | (rheumatoid AND ('arthritis'/exp OR arthritis) OR 'arthritis'/exp OR arthritis AND rheumatoid) |
| 2 | ('bms 188667'/exp OR 'bms 188667') OR (bms AND 188667) OR ('orencia'/exp OR orencia) OR ('ctla4 ig'/exp OR 'ctla4 ig') OR ('ctla4 fc') OR ('ctla4 ig'/exp OR 'ctla4 ig' AND immunoconjugate) OR (cytotoxic AND t AND 'lymphocyte associated' AND ('antigen'/exp OR antigen) AND '4 immunoglobulin') OR ('ctla 4 ig') OR ('bms 224818'/exp OR 'bms 224818') OR ('bms224818'/exp OR bms224818) OR ('lea29y'/exp OR lea29y) OR ('belatacept'/exp OR belatacept) OR ('abatacept'/exp OR abatacept) |
| 3 | ('clinical practice'/exp OR 'clinical practice' OR clinical AND practice OR 'register' OR 'register'/exp OR register OR 'population' OR 'population'/exp OR population OR 'cohort analysis'/exp OR 'cohort analysis' OR cohort OR 'data base'/exp OR 'data base' OR 'database'/exp OR database OR 'registration' OR 'registration'/exp OR registration OR ('prescription' OR 'prescription'/exp OR prescription AND practice) OR data AND ('base'/exp OR base) OR 'registration'/exp OR registration OR 'prescription'/exp OR prescription AND practice OR 'population'/exp OR population AND ('register'/exp OR register) OR 'population'/exp OR population AND registers OR register, AND ('population'/exp OR population) OR registers, AND ('population'/exp OR population) OR 'database'/exp OR database OR 'population'/exp OR population AND characteristic OR populations OR 'population'/exp OR population OR cohort OR 'registry'/exp OR registry OR 'register'/exp OR register OR registers OR 'registries'/exp OR registries OR variations, AND practice AND pattern OR characteristic, AND ('population'/exp OR population) OR characteristics, AND ('population'/exp OR population) OR patterns, AND ('physician'/exp OR physician) AND practice OR 'physician'/exp OR physician AND practice AND patterns OR real AND ('life'/exp OR life) OR clinical AND practice AND patterns OR pattern, AND clinical AND practice OR practice AND pattern AND variations OR practice AND pattern AND variation OR variation, AND practice AND pattern OR clinical AND practice AND pattern OR practice AND patterns, AND clinical OR patterns, AND clinical AND practice OR practice AND pattern, AND clinical OR practice AND pattern, AND professional OR professional AND practice AND pattern OR professional AND practice AND patterns OR practice AND patterns, AND professional OR pattern, AND professional AND practice OR patterns, AND professional AND practice OR practice AND variations, AND clinical OR variation, AND clinical AND practice OR variations, AND clinical AND practice OR clinical AND practice AND variations OR practice AND pattern, AND physician’s OR 'physicians'/exp OR physicians AND practice AND pattern OR physician’s AND practice AND pattern OR clinical AND practice ) |
| 4 | 1 AND 2 AND 3 |
| **EULAR** | |
|  | ABATACEPT AND RHEUMATOID ARTHRITIS AND REGISTRY |
|  | ABATACEPT AND RHEUMATOID ARTHRITIS AND CLINICAL PRACTICE |
|  | ABATACEPT AND RHEUMATOID ARTHRITIS AND POPULATION |
|  | ABATACEPT AND RHEUMATOID ARTHRITIS AND COHORT (22 ABS) |
|  | ABATACEPT AND RHEUMATOID ARTHRITIS AND REGISTER (10 ABS) |
|  | ABATACEPT AND RHEUMATOID ARTHRITIS AND REGISTERS/REGISTRIES (9 ABS) |
|  | ABATACEPT AND RHEUMATOID ARTHRITIS AND DATABASE (11 ABS) |
|  | ABATACEPT AND RHEUMATOID ARTHRITIS AND REGISTRATION (1 ABS DUPLICADO) |
|  | ORENCIA AND RHEUMATOID ARTHRITIS AND REGISTRY (repetidos en las estrategias anteriores) 5 ABSTRACTS |
|  | ORENCIA AND RHEUMATOID ARTHRITIS AND CLINICAL PRACTICE (repetidos en las estrategias anteriores) 2 ABSTRACTS |
|  | ABATACEPT AND RHEUMATOID ARTHRITIS AND physicians Practice Patterns, Practice Pattern, Physician’s, Practice Patterns, Physician’s, Clinical Practice Variations, Variations, Clinical Practice, Practice Variations, Clinical, Variation, Clinical Practice, Practice Patterns, Professional, Pattern, Professional Practice, Patterns, Professional Practice, Practice Pattern, Professional, Professional Practice Pattern, Professional Practice Patterns, Clinical Practice Pattern, Practice Patterns, Clinical, Patterns, Clinical Practice, Practice Pattern, Clinical, Clinical Practice Patterns, Pattern, Clinical Practice, Practice Pattern Variations, Practice Pattern Variation, Variation, Practice Pattern, Variations, Practice Pattern, Pattern, Physician's Practice, Patterns, Physician's Practice, Physician Practice Patterns, Characteristic, Population, Characteristics, Population, Population Characteristic, Population Register, Population Registers, Register, Population, Registers, Population, prescription practice (SOLO TITULO) |
|  | ABATACEPT AND RHEUMATOID ARTHRITIS AND REAL LIFE (10 ABST) |
| **ACR** | |
|  | 5 abstracts abatacept, 4 de los cuales estaban duplicados con los abstracts de eular queda 1 seleccionado |

## Resultados

La Figura 1 muestra el resultado de la estrategia de búsqueda y selección de artículos. En total se rescataron 596 estudios entre Pubmed (91) y Embase (505), de los cuales 68 fueron excluidos por duplicados. Posteriormente se revisaron los archivos desde 2005 de los congresos EULAR y ACR, de los cuales tras excluir duplicados o tema no relacionado quedaron 12, lo cual supuso revisar títulos y *abstracts* de 688 artículos. Tras revisión de título y *abstract*, fueron excluidos 624 artículos por no relación con el tema, tipo de diseño inadecuado o idioma no incluido. Se revisaron en detalle 64 artículos completos.

**Figura 1.** Flujo del estudio


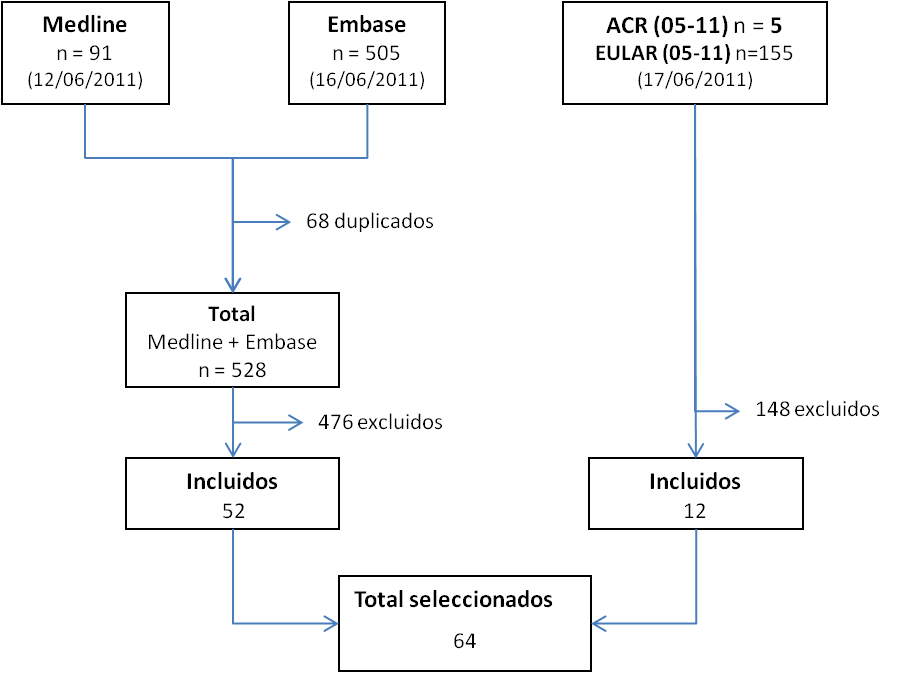


### Estudios excluidos

La **Tabla 3** muestra un listado de los 52 artículos excluidos tras revisión detallada y la razón para su exclusión. Muchos de ellos eran revisiones narrativas y otros muchos extensiones de ensayos clínicos, que no reflejan la práctica clínica habitual.

**Tabla 3**. Estudios excluidos y motivo de exclusión.

| **Autor, año** | **motivo** |
| --- | --- |
| BMJ group, 2008 ([4](#_ENREF_4)) | No es un registro |
| Alten R, 2006 ([5](#_ENREF_5)) | Está en alemán |
| Boers M, 2006 ([6](#_ENREF_6)) | No es un registro |
| Butun B, 2010 ([7](#_ENREF_7)) | No es un registro. Revisión de dianas terapéuticas y datos de ensayos clínicos. |
| Emery P, 2005 ([8](#_ENREF_8)) | No es un registro. Son datos de un ensayo clínico fase III |
| Emery P, 2006 ([9](#_ENREF_9)) | No es un registro. |
| Falgarone G, 2009 ([10](#_ENREF_10)) | No es un registro |
| Fan PT, 2007 ([11](#_ENREF_11)) | No es un registro |
| Fernandez J, 2006 ([12](#_ENREF_12)) | No es un registro |
| Finckh A, 2010 ([13](#_ENREF_13)) | No es un registro. No hay datos de registros sobre abatacept |
| Graninger W, 2010 ([14](#_ENREF_14)) | Está en alemán. |
| Haraoui B, 2009 ([15](#_ENREF_15)) | No es un registro |
| Horak P, 2010 ([16](#_ENREF_16)) | Está en checo |
| Iking-Konert C, 2008 ([17](#_ENREF_17)) | Está en alemán |
| Gottenberg, 2010 ([18](#_ENREF_18)) | No dan datos de eficacia. Se trata de un estudio para ver la tolerancia al abatacept tras el tratamiento con rituximab como último biológico. |
| Keystone, 2009 ([19](#_ENREF_19)) | No es un registro |
| Klareskog L, 2009 ([20](#_ENREF_20)) | No es un registro |
| Kuek A, 2007 ([21](#_ENREF_21)) | No es un registro |
| Lipsky PE, 2006 ([22](#_ENREF_22)) | No es un registro |
| Lorenz HM, 2003 ([23](#_ENREF_23)) | No es un registro. Revisión de tratamiento AR. |
| Lu CY, 2009 ([24](#_ENREF_24)) | No es un registro. Explica cómo son las bases de datos en Australia |
| Malmstrom V, 2005 ([25](#_ENREF_25)) | No es un registro. Revisión acción molecular abatacept |
| Mariette X, 2011 ([26](#_ENREF_26)) | No dan datos de eficacia sólo de seguridad. |
| Martin K, 2007 ([27](#_ENREF_27)) | No es un registro |
| Massarotti EM, 2009 ([28](#_ENREF_28)) | No es un registro. No datos de abatacept. |
| Mikuls TR, 2010 ([29](#_ENREF_29)) | No es un registro |
| Moreland L, 2006 ([30](#_ENREF_30)) | No es un registro. Datos basados en ensayo clínico. |
| Nolan M, 2008 ([31](#_ENREF_31)) | No es un registro |
| Oei HB, 2009 ([32](#_ENREF_32)) | Analizan las causas de *switch* de fármacos biológicos. Pero no analizan resultados de abatacept de forma individual |
| Pablos Alvarez JL, 2006 ([33](#_ENREF_33)) | No es registro, revisión de etiopatogenia y dianas terapéuticas. |
| Paget SA, 2007 ([34](#_ENREF_34)) | No es un registro |
| Parchamazad P, 2005 ([35](#_ENREF_35)) | No es un registro. Datos de ensayos clínicos. |
| Posadas A, 2009 ([36](#_ENREF_36)) | No es un registro. |
| Prati C, 2011 ([37](#_ENREF_37)) | No es un registro |
| Ramiro S, 2010 ([38](#_ENREF_38)) | No es un registro |
| Rendas-Baum R, 2010 ([39](#_ENREF_39)) | No es un registro |
| Russell AS, 2009 ([40](#_ENREF_40)) | No es un registro |
| Saito K, 2008 ([41](#_ENREF_41)) | Está publicado en japonés |
| Sfriso P, 2009 ([42](#_ENREF_42)) | Es un registro pero no da datos de eficacia con abatacept, da datos de anti-TNF |
| Sibilia J, 2009 ([43](#_ENREF_43)) | No es un registro. Revisión de acción molecular de anti-TNF y abatacept |
| Siddiqui M.A.A, 2007 ([44](#_ENREF_44)) | No es un registro |
| Siegel J, 2008 ([45](#_ENREF_45)) | No es un registro. |
| Silman AJ, 2009 ([46](#_ENREF_46)) | No es un registro |
| Sokka T, 2008 ([47](#_ENREF_47)) | No es un registro. No datos de abatacept. |
| Sokka T. 2008 ([48](#_ENREF_48)) | No es un registro. |
| Strehblow C, 2010 ([49](#_ENREF_49)) | Sólo dicen que 1 paciente hizo 3er *switch* a abatacept y no da ningún otro dato |
| Taylor PC, 2006 ([50](#_ENREF_50)) | No es un registro. Ensayo fase III. |
| Tran S, 2009 ([51](#_ENREF_51)) | No incluye medidas de desenlace ni datos de abatacept. Supervivencia global |
| Van Vollenhoven RF, 2011 ([52](#_ENREF_52)) | No es un registro |
| Westhovens R, 2009 ([53](#_ENREF_53)) | Datos de ensayo clínico y población AR de inicio. |
| Wolfe F, 2010 ([54](#_ENREF_54)) | Analiza el tratamiento biológico en global pero no da datos de abatacept. |
| Yazici Y, 2008 ([55](#_ENREF_55)) | Es registro pero no datos de abatacept |

### Estudios incluidos

En total, esta revisión incluye 12 estudios, cuya descripción se muestra en la tabla de evidencia (**Tabla 4**). De los 12, 10 son *abstracts* de congresos, 1 es un artículo publicado en *Ann Rheum Dis* ([56](#_ENREF_56)) y otro es un artículo del 2010 en *Future Medicine* ([57](#_ENREF_57)). Todos son datos de registros o estudio observacionales.

**Tabla 4.** Tabla de evidencia de los estudios incluidos.

| **Estudio** | **Metodología** | **Población** | **Intervenciones analizadas** | **Desenlaces comparados** | **Calidad del estudio*** | **Conflictos de interés** |
| --- | --- | --- | --- | --- | --- | --- |
| Schiff, 2010 ([57](#_ENREF_57)) | Estudio observacional retrospectivo | AR con enfermedad activa. Al menos 6 meses de tto con ABA. 97% fracaso al menos un anti-TNF | Abatacept 10 mg/kg | DAS28  CDAI  Eficacia tras switch | 5🞿 | BMS |
| Gibofsky, 2009 ([58](#_ENREF_58)) | Registro CORRONA | AR con enfermedad activa y FR+ en 92% con al menos 6 meses de seguimiento. | Abatacept | CDAI, RAPID3, valoración global del médico, valoración global del paciente, EVA dolor, astenia, problemas de sueño, rigidez matutina | 7🞿 | BMS, J&J, Abbott, Amgem, Wyeth, Centocor, Roche, Genentech, Novartis, UCB |
| Remy, 2011 ([59](#_ENREF_59)) | Registro ORA | AR con enfermedad activa. Los 2 grupos con características similares en número de anti-TNFs previos al tratamiento con rituximab, tiempo entre inicio de rituximab y abatacept, duración de la enfermedad, edad y DAS28 basal. | TNFi-RTX-TNFi (grupo 1)  Abatacept en switch tras TNFi y RTX (grupo 2) | Respuesta EULAR buena o moderada tras switch  Datos de eficacia a los 3,6 y 12 meses | 8🞿 | No declarados |
| Donato, 2009 ([60](#_ENREF_60)) | Registro canadiense | AR con enfermedad severa | Abatacept | Mejoría en HAQ.  Cambio HAQ en función de anti-TNF previos | 6🞿 | BMS |
| Gottenberg, 2011 ([61](#_ENREF_61)) | Registro ORA de la Sociedad Francesa de Reumatología | AR con cualquier actividad.  88,6% habían recibido tratamiento con al menos 1 anti-TNF y el 29,8% habían recibido tto con rituximab.  66,2% estaban con FAMES (52,4% con metotrexate) | Abatacept | Respuesta EULAR buena y moderada, LDAS28, DAS28 remisión, descenso medio del DAS 28 | 6 🞿 | No declarados |
| Harrold, 2011 ([62](#_ENREF_62)) | Registro CORRONA | AR activa y naive a tto biológico | Abatacept  Anti-TNFs | CDAI, ACR 20, remisión a los 12 meses | 6🞿: | BMS, Roche, Genetech |
| Buch 2010 ([63](#_ENREF_63)) | Base de datos de un hospital inglés | AR activa.  No había diferencias en las características de seropositivos y seronegativos. | Abatacept | Supervivencia de abatacept en pacientes seronegativos y seropositivos | 5🞿 | BMS |
| Massafra, 2010 ([64](#_ENREF_64)) | Cohorte de pacientes del hospital "San Pietro", Roma | AR con tratamiento previo con anti-TNF tratados al menos durante seis meses con abatacept | Abatacept | DAS 28 tras switch a los 6 meses  Eficacia de abatacept en switch tras TNFi en función de si el abandono del TNFi ha sido por efectos secundarios (grupo 1) o por falta de eficacia (grupo 2) | 8 🞿 | No declarados |
| Leffers, 2011 ([56](#_ENREF_56), [65](#_ENREF_65)) | Registro DANBIO | AR tratados con abatacept y tocilizumab.  La mayoría de los pacientes habían sido tratatos con MTX y al menos con un anti-TNF. | Abatacept  Tocilizumab | Supervivencia, respuesta EULAR, DAS 28, HAQ a las 24 y 48 semanas. | 8🞿 | Abbott, Centocor, Roche, Schering-Plough, UCB, Wyeth, BMS, GSK, Pfizer, Amgen, Novo Nordisk |
| Gottenberg, 2010 ([66](#_ENREF_66)) | Registro ORA de la Sociedad Francesa de Reumatología.  Duración media del seguimiento 48 semanas | AR activas procedentes de 82 centros.  Tto previo con anti-TNF (87,2%); 28,6% con rituximab. | Abatacept | Respuesta EULAR buena y moderada  6 meses | 5🞿 | No declarados |
| Harrold, 2010 ([67](#_ENREF_67)) | Registro multicéntrico (CORRONA) | AR naive a biológicos. Características comparables en cuanto medicación concomitante y otras características basales | Abatacept  Anti TNF | Valoración global del paciente, EVA dolor, supervivencia  12 meses | 6🞿 | BMS, Roche, Genetech |

Abreviaturas: AR (artritis reumatoide); ABA (abatacept); tto, tratamiento

* Según escala de New Castle-Ottawa para cohortes o series de casos.

Los datos de abatacept sobre efectividad en la práctica clínica derivada de registros han aparecido fundamentalmente en estos tres últimos años. En general se puede decir que los datos se corresponden con lo ya conocido por los ensayos clínicos, aunque en estas comparaciones siempre hay que tener en cuenta los sesgos que implica el tratamiento en la práctica clínica, con pacientes muy diferentes a los que habitualmente constituyen las poblaciones de los ensayos clínicos.

Un estudio observacional retrospectivo analizó los resultados de la administración de abatacept en 100 pacientes de los cuales el 97% había recibido previamente algún inhibidor del TNF, mostrando que a los 6 meses el 80% seguía en tratamiento con abatacept y que el 44% y 34% habían alcanzado baja actividad y remisión, respectivamente ([57](#_ENREF_57)). El registro francés ORA ([18](#_ENREF_18), [66](#_ENREF_66)) comunicó los datos de efectividad en 133 pacientes tratados con abatacept, de los cuales solo el 9,5% no había recibido un biológico previo, mostrando que a los 6 meses el 66% había alcanzado una respuesta EULAR (buena o moderada). El registro danés DANBIO ([56](#_ENREF_56)) presentó los datos de 150 pacientes tratados con abatacept. Como en el registro anterior, solo una pequeña proporción, 5%, no había recibido inhibidores del TNF previos. El DAS28PCR en la basal y a las 24 y 48 semanas fue del 5,3; 3,4 y 3,3 respectivamente. El registro estadounidense CORRONA ([67](#_ENREF_67)) analizó pacientes tratados con abatacept y con inhibidores del TNF, que no habían recibido previamente otros biológicos. Una vez ajustadas las poblaciones, el análisis a los 2 años de tratamiento demostró, que la probabilidad de suspender el tratamiento debido a una pérdida de efectividad era similar en los pacientes que recibieron abatacept o anti-TNF (HR 0,88; 95% IC 0,51-1,52). Tampoco hubo diferencias en la respuesta clínica evaluada por el paciente en lo que concernía a su situación global y dolor ([67](#_ENREF_67)). El seguimiento de pacientes tratados con abatacept en este mismo registro también ha demostrado una mejoría gradual en el cansancio y los trastornos del sueño y una tendencia a reducir la media de los días de trabajo perdidos ([58](#_ENREF_58)). Asimismo, un registro canadiense demostró que un porcentaje significativo de pacientes tratados con abatacept alcanzaron una mejoría clínicamente significativa en la capacidad funcional valorada por el HAQ (≥ 0,3); esto se produjo alrededor de los dos meses de tratamiento y no influyó el numero de inhibidores del TNF previos que los pacientes habían recibido ([60](#_ENREF_60)). Finalmente, datos recientes del registro francés de pacientes tratados con abatacept, abogan por una respuesta superior en los pacientes que son FR/anti-CCP positivos ([61](#_ENREF_61)). No obstante, en un estudio anterior y con un análisis diferente, Buch *et al* ([63](#_ENREF_63)) no habían encontrado diferencias entre ambas poblaciones.

## Discusión

Los datos de eficacia analizados en los 12 estudios seleccionados, provienen de registros en su mayoría o en cohortes de un centro concreto (59,60). Este tipo de registros nos intentan proporcionar datos del comportamiento de abatacept en la práctica clínica habitual, a diferencia de los ensayos clínicos que se desarrollan en un escenario de idealidad.

Parece, según los datos de estos registros, que la eficacia es similar a la observada en los ensayos clínicos realizados con abatacept, tanto en pacientes sin tratamiento biológico previo, como en *switch*. Esta respuesta no parece influenciarse por el número de inhibidores del TNF previos ni por la causa del fracaso de los mismos (efectos secundarios, ineficacia...).

En uno de los estudios ([61](#_ENREF_61)) obtenían mejor respuesta clínica al tratamiento con abatacept los pacientes seropositivos.

De todas formas, será necesario más tiempo de seguimiento y cohortes mayores para confirmar estos resultados ya que la mayoría no tenían un seguimiento mayor a 12 meses.

# Comparación de abatacept con otros biológicos en artritis reumatoide

**Autor**: Loreto Carmona

## Justificación

La información comparativa es crítica para la toma de decisiones. A pesar de que de forma intuitiva todos los clínicos lo hacen, en ausencia de ensayos clínicos aleatorizados (ECA) *head-to-head*, las intervenciones no deben compararse directamente, dado que los resultados concretos de un estudio pueden deberse a factores externos a la intervención. Es por eso que se han desarrollado las técnicas de comparaciones indirectas, también denominadas evaluaciones indirectas, comparaciones de tratamientos mezclados, *network meta-analysis* o meta-análisis de múltiples comparaciones. Estas técnicas utilizan la información de los ECA pero ajustada a las posibles diferencias clínicas, metodológicas y estadísticas.

El mayor problema a la hora de revisar estudios de comparaciones indirectas es que no existe una herramienta de valoración cualitativa de dichos estudios, por lo que el requisito mínimo es exigir transparencia en la publicación, lo único que quizás permitirá valorar la validez de las conclusiones. Los aspectos que permitirán considerar un estudio de comparaciones indirectas válido se comentan a continuación.

- Homogeneidad clínica en los estudios comparados. Esto es, que por las características de la población, condiciones coexistentes, grupo placebo, co-intervenciones y resultados evaluados en los estudios se pueda suponer que se trata de condiciones muy similares
- Homogeneidad metodológica entre estudios. Que no pueda suponerse que las diferencias entre estudios en los tamaños estimados del efecto que pueden ser atribuidos a la variabilidad y calidad y a los tipos de diseños de los estudios.
- Homogeneidad estadística de los resultados del grupo control.

Otros aspectos importantes serían independencia científica, validez de la revisión sistemática subyacente, pero sobre todo la utilización de algún método estadístico convincente que permita el ajuste por la variabilidad entre estudios.

En base a estos aspectos, hemos querido examinar la literatura con objeto de recabar la información más pertinente de comparaciones entre fármacos biológicos que incluyan el abatacept.

## Métodos

Se seleccionaron todos los estudios que compararan la eficacia o seguridad de abatacept con otros biológicos como primera o sucesiva opción en artritis reumatoide. Los diseños aceptados fueron: ensayos clínicos *head-to-head* y meta-análisis con comparaciones indirectas. Límites: Inglés, español, italiano o francés, humanos.

Se realizó una búsqueda sensible en Medline a través de Pubmed y en Embase (**Tabla 5**) directamente en su servidor que capturara todos los ensayos clínicos y revisiones sistemáticas de abatacept. Ambas búsquedas se realizaron el día 3/6/11. Con posterioridad se fijó una alerta en Pubmed para artículos más recientes. No se revisaron *abstract* de congresos de forma específica.

**Tabla 5.** Estrategias de búsqueda.

| **Pubmed** |
| --- |
| (abatacept OR BELATACEPT OR LEA29Y OR BMS224818 OR BMS-224818 OR CTLA-4-Ig OR cytotoxic T lymphocyte-associated antigen 4-immunoglobulin OR CTLA4-Ig immunoconjugate OR CTLA4-Fc OR CTLA4-Ig OR Orencia OR BMS 188667 OR BMS-188667) |
| AND |
| ( (systematic review [ti] OR meta-analysis [pt] OR meta-analysis [ti] OR systematic literature review [ti] OR (systematic review [tiab] AND review [pt]) OR consensus development conference [pt] OR practice guideline [pt] OR cochrane database syst rev [ta] OR acp journal club [ta] OR health technol assess [ta] OR evid rep technol assess summ [ta]) OR ( (evidence based[ti] OR evidence-based medicine [mh] OR best practice* [ti] OR evidence synthesis [tiab])AND (review [pt] OR diseases category[mh] OR behavior and behavior mechanisms [mh] OR therapeutics [mh] OR evaluation studies[pt] OR validation studies[pt] OR guideline [pt]))OR ( (systematic [tw] OR systematically [tw] OR critical [tiab] OR (study selection [tw]) OR (predetermined [tw] OR inclusion [tw] AND criteri* [tw]) OR exclusion criteri* [tw] OR main outcome measures [tw] OR standard of care [tw] OR standards of care [tw]) AND (survey [tiab] OR surveys [tiab] OR overview* [tw] OR review [tiab] OR reviews [tiab] OR search* [tw] OR handsearch [tw] OR analysis [tiab] OR critique [tiab] OR appraisal [tw] OR (reduction [tw]AND (risk [mh] OR risk [tw]) AND (death OR recurrence))) AND (literature [tiab] OR articles [tiab] OR publications [tiab] OR publication [tiab] OR bibliography [tiab] OR bibliographies [tiab] OR published [tiab] OR unpublished [tw] OR citation [tw] OR citations [tw] OR database [tiab] OR internet [tiab] OR textbooks [tiab] OR references [tw] OR scales [tw] OR papers [tw] OR datasets [tw] OR trials [tiab] OR meta-analy* [tw] OR (clinical [tiab] AND studies [tiab]) OR treatment outcome [mh] OR treatment outcome [tw])) NOT (letter [pt] OR newspaper article [pt] OR comment [pt]) |
| OR |
| ( (clinical[Title/Abstract] AND trial[Title/Abstract]) OR clinical trials[MeSH Terms] OR clinical trial[Publication Type] OR random*[Title/Abstract] OR random allocation[MeSH Terms] OR therapeutic use[MeSH Subheading])) |
| **Embase** |
| ('bms 188667'/exp OR 'bms 188667') OR (bms AND 188667) OR ('orencia'/exp OR orencia) OR ('ctla4 ig'/exp OR 'ctla4 ig') OR ('ctla4 fc') OR ('ctla4 ig'/exp OR 'ctla4 ig' AND immunoconjugate) OR (cytotoxic AND t AND 'lymphocyte associated' AND ('antigen'/exp OR antigen) AND '4 immunoglobulin') OR ('ctla 4 ig') OR ('bms 224818'/exp OR 'bms 224818') OR ('bms224818'/exp OR bms224818) OR ('lea29y'/exp OR lea29y) OR ('belatacept'/exp OR belatacept) OR ('abatacept'/exp OR abatacept) |
| AND |
| ( (clinical AND trial OR clinical AND trial$ OR random$ OR random AND allocation OR therapeutic AND use) |
| OR |
| (systematic AND 'review'/exp OR 'meta analysis'/exp OR systematic AND 'literature'/exp AND 'review'/exp OR (systematic AND 'review'/exp) OR ('consensus'/exp AND 'development'/exp AND conference OR practice AND guideline OR cochrane AND 'database'/exp AND syst AND rev OR acp AND'journal'/exp AND club OR 'health'/exp AND technol AND assess OR evid AND rep AND technol AND assess AND summ) OR (evidence AND 'based'/exp OR'evidence based'/exp AND 'medicine'/exp OR best AND practice$ OR evidence AND 'synthesis'/exp AND ('review'/exp OR diseases AND category OR 'behavior'/exp AND 'behavior'/exp AND mechanisms OR 'therapeutics'/exp OR 'evaluation'/exp AND studies OR validation AND studies OR guideline)) OR (systematic ORsystematically OR critical OR ('study'/exp AND selection) OR (predetermined OR inclusion AND criteri$) OR exclusion AND criteri$ OR main AND outcome ANDmeasures OR 'standard'/exp AND of AND care OR standards AND of AND care AND (survey OR surveys OR overview$ OR 'review'/exp OR reviews OR search$ ORhandsearch OR 'analysis'/exp OR critique OR appraisal OR ('reduction'/exp AND 'risk'/exp AND ('death'/exp OR 'recurrence'/exp))) AND ('literature'/exp OR articlesOR 'publications'/exp OR 'publication'/exp OR 'bibliography'/exp OR bibliographies OR published OR unpublished OR citation OR citations OR 'database'/exp OR'internet'/exp OR 'textbooks'/exp OR references OR scales OR papers OR datasets OR trials OR 'meta analy$' OR (clinical AND studies) OR treatment ANDoutcome OR treatment) AND outcome) NOT ('letter'/exp OR 'newspaper'/exp AND 'article'/exp OR comment)) |

##

## Resultados

La **Figura 2** muestra el resultado de la estrategia de búsqueda y de la selección de los artículos. En total se rescataron 1688 estudios entre Pubmed (885) y Embase (664), de los cuales 139 fueron excluidos por estar duplicados, lo cual supuso revisar títulos y *abstracts* de 1.410 artículos. Tras revisión de título y *abstract*, fueron excluidos 1.367 artículos por no tener relación con el tema, un tipo de diseño inadecuado o estar publicados en un idioma no incluido. Se revisaron en detalle 43 artículos completos.

**Figura 2.** Flujo del estudio


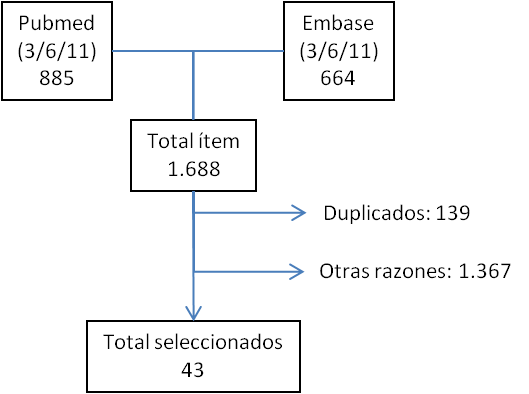


### Estudios excluidos

La **Tabla 6** muestra un listado de los 36 artículos excluidos tras revisión detallada y la razón para su exclusión. Muchos de ellos eran revisiones narrativas. Las revisiones sistemáticas excluidas no incluían la realización de comparaciones indirectas propiamente dichas. Ningún estudio de coste efectividad quedó finalmente incluido.

**Tabla 6**. Estudios excluidos y motivo de exclusión.

| **Autor, año** | **Motivo** |
| --- | --- |
| Alivernini, 2009 ([68](#_ENREF_68)) | Se trata de una RS tanto de estudios observacionales como de extensión de ECAs con baja n en la que no se pueden hacer comparaciones indirectas propiamente dichas. |
| Audrey, 2010 ([69](#_ENREF_69)) | Se trata de una RS denominada por sus autores como comparaciones indirectas, pero que no explica cómo ajustan. La información se encuentra disponible sólo en formato de *abstract*. |
| Barnabe, 2009 ([70](#_ENREF_70)) | Estudio observacional pequeño (n= 40) de un solo centro en el que no puede ajustarse por ningún factor de confusión. |
| Beresniak, 2009 ([71](#_ENREF_71)) | Estudio disponible únicamente en formato *abstract* en el que es imposible determinar sesgos potenciales |
| Beresniak, 2009 ([72](#_ENREF_72)) | Estudio disponible únicamente en formato *abstract* en el que es imposible determinar sesgos potenciales |
| Buch, 2010 ([73](#_ENREF_73)) | Revisión narrativa |
| Chauffier, 2011 ([74](#_ENREF_74)) | RS con fatiga como medida de desenlace. No realiza comparaciones indirectas, sino directas. |
| Emery, 2009 ([75](#_ENREF_75)) | Estudio disponible únicamente en formato *abstract* en el que es imposible determinar sesgos potenciales |
| Finckh, 2010 ([13](#_ENREF_13)) | Revisión narrativa |
| Furst, 2011 ([76](#_ENREF_76)) | No aporta datos de comparaciones entre biológicos |
| Gartlehner, 2006 ([77](#_ENREF_77)) | Revisión sistemática y comparaciones indirectas de las que se excluye el abatacept por datos insuficientes según autores. |
| Graudal, 2010 ([78](#_ENREF_78)) | Varios meta-análisis correctos, sin embargo no se realizan comparaciones indirectas propiamente dichas. No se puede concluir que existan diferencias entre agentes sin ajustar por las diferencias entre estudios. |
| Hallinen, 2010 ([79](#_ENREF_79)) | Compara estrategias de tratamiento y no da datos de eficacia, solo de coste. Estudio de coste utilidad financiado por compañía farmacéutica en el que el fármaco más costo-eficaz es el de la compañía. |
| Harrold, 2010 ([67](#_ENREF_67)) | Estudio observacional anidado en el CORRONA que compara abatacept frente a anti-TNF de inicio. Excluido por ser observacional. |
| Kraishi, 2009 ([80](#_ENREF_80)) | Revisión narrativa |
| Kristensen, 2011 ([81](#_ENREF_81)) | RS denominada por los autores como comparaciones indirectas pero que son directas a partir de los NNT de estudios individuales. Sólo incluye además 5 estudios. |
| Kuriya, 2010 ([82](#_ENREF_82)) | Se trata de un meta-análisis muy interesante, dado que muestra la eficacia en la progresión radiológica, sin embargo, agrupa los resultados de todos los biológicos frente a metotrexato y, aunque pueden verse en los gráficos estudios individuales, no se puede concluir que existan diferencias entre agentes sin ajustar por las diferencias entre estudios. |
| Kruse, 2009 ([83](#_ENREF_83)) | Estudio observacional en el que se recogen datos de coste de una base de datos administrativa. No se miden otros resultados. |
| López-Olivo, 2010 (a)([84](#_ENREF_84)) | Sólo accesible en formato abstract. No aporta datos comparativos entre agentes, sino que agrupa todos para informar sobre riesgo de cáncer. |
| López-Olivo, 2010 (b) | Sólo aporta datos sobre la calidad de los estudios de coste-efectividad, no aporta figuras comparativas en cuanto a efectividad o coste. |
| Nam, 2010 ([85](#_ENREF_85)) | Varios meta-análisis correctos, sin embargo no se realizan comparaciones indirectas propiamente dichas. No se puede concluir que existan diferencias entre agentes sin ajustar por las diferencias entre estudios. |
| Narayanan, 2009 ([86](#_ENREF_86)) | Estudio observacional pequeño (n=100). No da datos comparativos. |
| Pruhs, 2009 ([87](#_ENREF_87)) | Estudio disponible únicamente en formato abstract en el que es imposible determinar sesgos potenciales |
| Rau, 2010 ([88](#_ENREF_88)) | Comparaciones indirectas entre metotrexato y biológicos, no entre biológicos. Además no encuentra datos para poder comparar metotrexato-naive frente a abatacept. Si frente a otros biológicos, no existiendo diferencias como primera opción. |
| Rubbert-Roth, 2009 ([89](#_ENREF_89)) | Revisión narrativa |
| Russell, 2009a ([40](#_ENREF_40)) | Revisión narrativa |
| Russell, 2009b ([90](#_ENREF_90)) | Modelización de costes no basada en comparaciones indirectas, sino en asunciones clínicas. |
| Salliot, 2009 ([91](#_ENREF_91)) | Meta-análisis sin comparaciones indirectas. |
| Saraux, 2010 ([92](#_ENREF_92)) | Modelización de costes no basada en comparaciones indirectas, sino en asunciones clínicas o ECA seleccionados. |
| Schoels, 2010 ([93](#_ENREF_93)) | RS de estudios de modelización de costes. No basada en comparaciones indirectas, sino en asunciones clínicas o ECA seleccionados. |
| Singh, 2009 y 2010 ([94](#_ENREF_94), [95](#_ENREF_95)) | Son estudios totalmente adecuados, pero se trata de duplicados con menor información que un estudio incluido, que es una revisión de revisiones Cochrane ([96](#_ENREF_96)) |
| Smolen, 2010 ([97](#_ENREF_97)) | Recomendaciones Eular, pero sin la evidencia, que va en otro artículo ([85](#_ENREF_85)). |
| Turesson, 2009 ([98](#_ENREF_98)) | Estudio disponible únicamente en formato abstract en el que es imposible determinar sesgos potenciales |
| Venkateshan, 2009 ([99](#_ENREF_99)) | Es un meta-análisis correcto, pero no aporta datos de biológicos individuales, sino que los agrupa todos frente a metotrexato. |
| Yuan, 2010 ([100](#_ENREF_100)) | Modelización basada en estudios que aunque comparables su comparación no estaba ajustada. Informe de compañía (BMS) |

Abreviaturas, RS, revisión sistemática; ECA, ensayos clínicos aleatorizados.

### Estudios incluidos

En total, esta revisión incluye 7 estudios, cuya descripción se muestra en la tabla de evidencia (**Tabla 7**). De los 7 estudios incluidos, uno es un ECA que compara abatacept con infliximab a 3 mg/kg, el estudio ATTEST ([101](#_ENREF_101)), y los demás son revisiones sistemáticas con meta-análisis y una revisión de revisiones ([95](#_ENREF_95)).

En todos se realiza algún tipo de ajuste estadístico convincente para las estimaciones indirectas, desde el método de Bucher ([102](#_ENREF_102)), hasta modelos lineales generalizados jerarquizados con. No obstante, llama la atención que cada revisión utiliza un conjunto de estudios distintos. El estudio de Devine et al ([103](#_ENREF_103)), es junto con los de la base de datos Cochrane ([95](#_ENREF_95), [104](#_ENREF_104)) los que más ajustes realizan y además datos de más comparaciones proporcionan.

Los resultados de eficacia se muestran en la **Tabla 8** y los de seguridad en la **Tabla 9**. Los datos están expresados tanto en RR como en OR, especificándose a pie de tabla.

En general, abatacept no muestra un perfil ni mejor ni peor que los biológicos frente a los que se ha comparado en las poblaciones (fallo a MTX o a anti-TNF), medidas (ACR50 o 70) y tiempos (6 meses o 1 año) estudiados. Es posible, no obstante, que tenga menor eficacia a 6 meses que certolizumab y a un año que tocilizumab.

El estudio de Devine et al muestra un orden decreciente de efectividad en términos de ACR50 a 6 meses: certolizumab (log OR 2.6), tocilizumab (1.7), rituximab (1.6), infliximab (1.6), etanercept (1.4), adalimumab (1.4), golimumab (1.4), abatacept (1.2) y anakinra (1.0); y del ACR50 a 1 año: certolizumab (log OR 2.0), rituximab (2.0), adalimumab (1.4), infliximab (1.4), etanercept (0.9), y abatacept (0.6). No obstante, las diferencias por comparaciones indirectas entre biológicos no son estadísticamente significativas.

El estudio ATTEST, el único ECA doble ciego, controlado que compara directamente dos competidores ([101](#_ENREF_101)) sugiere una eficacia similar de infliximab y abatacept, pero con un mejor perfil de seguridad para el segundo. Aunque el ensayo no estuviera adecuadamente dimensionado para comparaciones entre brazos activos, si demuestra que los agentes biológicos pueden tener diferentes perfiles de seguridad al tiempo que ofrecen una eficacia similar.

**Tabla 7.** Tabla de evidencia de los estudios incluidos.

| **Estudio** | **Metodología** | **Población** | **Intervenciones analizadas** | **Desenlaces comparados** | **Conflictos de interés** |
| --- | --- | --- | --- | --- | --- |
| Schiff, 2008 ([101](#_ENREF_101)) | ECA doble ciego controlado a 6 meses + extensión abierta hasta 1 año. | AR de al menos 1 año de duración (media 8 años) con respuesta inadecuada a MTX y enfermedad activa y sin uso previo de biológicos. | abatacept (10 mg/kg), infliximab (3 mg/kg) o placebo IV + MTX | Criterios Eular de respuesta y ACR50 y 70 a 6 meses.  Seguridad | ECA pivotal industria |
| Bergman, 2010 ([105](#_ENREF_105)) | RS apropiada + comparaciones de tratamientos mezclados con ajuste clásico por modelo de efectos fijos (intervalos de confianza del 95%) | 18 estudios de AR con respuesta inadecuada a FAME / MTX.  Los criterios de inclusión y exclusión de estudios para asegurar homogeneidad clínica son aparentemente correctos.  Baja consistencia de resultados entre los grupo placebo. | Etanercept, infliximab, adalimumab, rituximab, abatacept y tocilizumab | ACR50 y ACR70 a 6 meses | Financiación y autoría por Roche. Muy probable. |
| Devine, 2011 ([103](#_ENREF_103)) | RS apropiada + comparaciones indirectas por regresión logística e interpretación bayesiana (intervalos creíbles) | 23 estudios de AR con respuesta inadecuada a FAME / MTX.  Baja consistencia de resultados entre los grupo placebo. | Abatacept, adalimumab, anakinra, certolizumab, etanercept, golimumab, infliximab, rituximab, y tocilizumab. | ACR50 a 6 y 12 meses | Departamento académico. No financiación de la industria. Poco probable. |
| Malottki, 2011 ([106](#_ENREF_106)) | RS apropiada + comparaciones indirectas por método de Bucher (intervalos de confianza del 95%) | Sólo considera comparables dos estudios, ATTAIN y REFLEX | Abatacept, rituximab | ACR50 y ACR70 a 6 meses  Seguridad | Informe de agencia estatal. No probable |
| Salliot, 2011 ([107](#_ENREF_107)) | RS apropiada + comparaciones indirectas por método de Bucher (intervalos de confianza del 95%) | 18 estudios de AR con respuesta inadecuada a FAME / MTX o a anti-TNF.  Reconocen cierta heterogeneidad de poblaciones clínicas y comparadores. | Abatacept, adalimumab, certolizumab, etanercept, golimumab, infliximab, rituximab, y tocilizumab. | ACR50 y ACR70 a 6 meses | Departamentos académicos. Poco probable. |
| Singh, 2010 ([96](#_ENREF_96)) | Revisión de RS + comparaciones indirectas por modelos lineales generalizados jerarquizados (intervalos de confianza del 95%) | 6 RS Cochrane de AR + biológicos. A su vez, estas contienen AR con respuesta inadecuada a FAME / MTX o a anti-TNF. | Abatacept, adalimumab, anakinra, etanercept, infliximab y rituximab | ACR 50  Seguridad | No aparentes |
| Singh, 2010 ([104](#_ENREF_104)) | RS apropiada + comparaciones indirectas por regresión logística ajustada | 163 ECA y 46 ensayos de extensión. Incluye todo tipo de enfermedades para las que se utilizan biológicos. | Abatacept, adalimumab, certolizumab, etanercept, golimumab, infliximab, rituximab, y tocilizumab | Seguridad | No aparentes |

Abreviaturas: RS, revisión sistemática; AR, artritis reumatoide; FAME, fármaco modificador de la enfermedad; MTX, metotrexato

**Tabla 8.** Resultados eficacia comparada de abatacept frente a otros biológicos*

| **Población** | **Estudio** | **Etanercept** | **Infliximab** | **Adalimumab** | **Rituximab** | **Tocilizumab** | **Golimumab** | **Certolizumab** | **Anakinra** |
| --- | --- | --- | --- | --- | --- | --- | --- | --- | --- |
| **Fallo a DMARD / MTX** | Medida de eficacia: ACR50 a 6 meses | | | | | | | | |
| Bergman, 2010 ([105](#_ENREF_105))† | 1.0 (0.8 - 1.2) | | | 1.0 (0.7 - 1.4) | 0.8 (0.6 - 1.0) | - | - | - |
| Devine, 2011 ([103](#_ENREF_103)) † | 0.8 (0.3 – 2.4) | 0.7 (0.3 – 2.2) | 0.8 (0.4 – 2.4) | 0.6 (0.1 – 4.5) | 0.6 (0.3 – 1.5) | 0.8 (0.3 – 2.0) | 0.2 (0.1 – 1.1) | 1.2 (0.6 – 4.0) |
| Salliot, 2010 ([107](#_ENREF_107))‡ | 0.7 (0.4 - 0.9) | | | 0.9 (0.5 - 1.5) | 0.5 (0.3 - 0.9) | - | 0.6 (0.5 - 0.9)‡ | - |
| Schiff, 2008 ([101](#_ENREF_101)) | - | 1.2 (0.8 - 1.5) | - | - | - | - | - | - |
| Singh, 2010 ([96](#_ENREF_96)) | 0.6 (0.3 – 1.3) | 1.0 (0.4 – 2.4) | 0.8 (0.4 – 1.5) | 0.7 (0.3 – 1.7) | - | - | - | 1.8 (0.8 – 4.0) |
| Medida de eficacia: ACR70 a 6 meses (IC 95%) | | | | | | | | |
| Bergman, 2010 ([105](#_ENREF_105)) † | 0.9 (0.6 - 1.2) | | | 0.8 (0.4 - 1.7) | 0.5 (0.3 - 0.8) | - | - | - |
| Malottki, 2011 ([106](#_ENREF_106)) † | - | - | - | 0.5 (0.1 – 4.2) | - | - | - | - |
| Schiff, 2008 ([101](#_ENREF_101)) | - | 0.8 (0.5 - 1.3) | - | - | - | - | - | - |
| Medida de eficacia: ACR50 a 1 año | | | | | | | | |
| Schiff, 2008 ([101](#_ENREF_101)) | - | 1.3 (0.9 - 1.7) | - | - | - | - | - | - |
| Medida de eficacia: ACR70 a 1 año | | | | | | | | |
| Schiff, 2008 ([101](#_ENREF_101)) | - | 1.3 (0.8 – 2.0) | - | - | - | - | - |  |
| **Fallo a anti-TNF** | Medida de eficacia: ACR50 a 6 meses | | | | | | | | |
| Malottki, 2011 ([106](#_ENREF_106)) † |  |  |  | 1.0 (0.3 – 2.3) | - | - | - | - |
| Salliot, 2010 ([107](#_ENREF_107))‡ |  |  |  | 0.9 (0.3 - 2.8) | 0.7 (0.2 - 2.6) | 1.2 (0.3 - 4.5) |  |  |

* Los datos de los intervalos son en ocasiones aproximados, pues sólo estaban en figura ([103](#_ENREF_103)). En otros, se ha invertido la cifra del artículo para adaptar a que abatacept es el grupo de referencia.

† Riesgo relativo (RR). En el estudio de Devine los intervalos no son los de confianza del 95%, sino los denominados creíbles (obtenidos por teorema de Bayes)

† Odds ratio (OR)

‡ Este OR no es de certolizumab puro, sino de todos los anti-TNF cuando se incluye certolizumab.

**Tabla 9.** Resultados de seguridad comparada de abatacept frente a otros biológicos

| **Estudio** | **Etanercept** | **Infliximab** | **Adalimumab** | **Rituximab** | **Tocilizumab** | **Golimumab** | **Certolizumab** | **Anakinra** |
| --- | --- | --- | --- | --- | --- | --- | --- | --- |
| **Medida de seguridad: Suspensiones del tratamiento por acontecimientos adversos** | | | | | | | | |
| Malottki, 2011 ([106](#_ENREF_106)) | - | - | - | 1.4 (0.8 – 2.3) | - | - | - | - |
| Schiff, 2008 ([101](#_ENREF_101)) | - | 0.4 (0.2 - 1.2) | - | - | - | - | - | - |
| Singh, 2010 ([96](#_ENREF_96)) | 1.5 (0.9 – 2.5) | 0.6 (0.3 – 1.1) | 0.8 (0.5 – 1.3) | 0.9 (0.4 – 2.0) | - | - | - | 0.7 (0.5 – 1.2) |
| Singh, 2010 ([104](#_ENREF_104)) | 0.8 (0.5 - 1.6) | 0.5 (0.3 – 1.0) | 1.1 (0.6 – 2.0) | 0.8 (0.4 - 1.7) | 0. 8 (0.4 - 1.7) | 1.0 (0.5 - 2.0) | 0.8 (0.4 - 1.6) | 0.7 (0.3 - 1.5) |
| **Medida de seguridad: Acontecimientos adversos graves** | | | | | | | | |
| Schiff, 2008 ([101](#_ENREF_101)) | - | 0.5 (0.3 - 0.9) | - | - | - | - | - | - |
| Singh, 2010 ([104](#_ENREF_104)) | 0.5 (0.3 - 0.9) | 0.5 (0.3 - 0.8) | 0.7 (0.4 - 1.1) | 0.6 (0.4 – 1.0) | 0.5 (0.3 – 1.0) | 0.6 (0.3 - 1.1) | 0. 5 (0.2 - 0.8) | 1.2 (0.6 - 2.4) |
| **Medida de seguridad: infecciones graves en 1 año** | | | | | | | | |
| Schiff, 2008 ([101](#_ENREF_101)) | - | 0.2 (0.1 - 0.7) | - | - | - | - | - | - |
| Singh, 2010 ([104](#_ENREF_104)) | 0.5 (0.3 - 1.1) | 0.4 (0.2 - 0.8) | 0.5 (0.2 - 1.1) | 0.6 (0.3 - 1.2) | 0.4 (0.2 - 0.8) | 0.4 (0.2 - 1.0) | 0.2 (0.1 - 0.4) | 0.5 (0.2 - 1.4) |

El perfil de seguridad de abatacept parece superior al de infliximab y etanercept, tocilizumab y certolizumab.

## Discusión

La revisión presente ha podido comprobar que los estudios que utilizan la técnica de comparaciones indirectas en biológicos en reumatología difieren entre sí en cuanto a los estudios seleccionados y a los métodos empleados, si bien en global puede decirse que muestran, de forma convincente, una eficacia comparada de abatacept similar a otros biológicos o ligeramente inferior con un mejor perfil de seguridad.

La eficacia relativa de los productos biológicos disponibles puede variar según la situación clínica. Alonso-Ruiz et al encontraron que el factor que más influye en la eficacia terapéutica de los anti-TNF los agentes fue la respuesta antes a FAME no biológicos ([108](#_ENREF_108)), Salliot et al observaron que los pacientes con un anti-TNF o tocilizumab después de una respuesta inadecuada a metotrexato tenían más probabilidades de lograr un ACR50 que los pacientes con abatacept o rituximab ([107](#_ENREF_107)), Devine et al mostraron el efecto que la duración de la enfermedad tiene sobre la respuesta general en los ECA ([103](#_ENREF_103)).

Malottki et al ([106](#_ENREF_106)), en su exhaustivo informe para la Agencia Británica de Tecnología en Salud, realizan un adecuado informe sobre los estudios comparativos aportados por la industria farmacéutica, en especial los de coste-efectividad, demostrando un elevado número de sesgos poteniales. En su informe evitan, de hecho, hacer comparaciones indirectas salvo en un caso, abatacept frente a rituximab, pues argumentan que todos los otros intentos están sujetos a diferencias no asumibles.

En términos de seguridad, el meta-análisis de Singh de 2011 ([104](#_ENREF_104)), realiza comparaciones indirectas en los casos en los que el modelo estadístico de convergencia les permite (los modelos no convergieron para tuberculosis, linfoma o insuficiencia cardíaca congestiva). Dos biológicos, abatacept y anakinra, se asociaron con menos efectos adversos graves significativamente en comparación con los otros productos biológicos. Abatacept se asoció también con un número significativamente menor de infecciones graves frente a infliximab y tocilizumab.

Esta revisión excluyó específicamente estudios observacionales, si bien fueron capturados algunos interesantes, como un abstract de la ACR de Harrold et al en el que comparan dos grupos de inicio, abatacept (n=57) frente a anti-TNF (n= 213)([67](#_ENREF_67)). Tras realizar ajustes adecuados por actividad basal y otros, no encuentran diferencias significativas entre grupos en cuanto a persistencia o efectividad en términos de dolor o actividad global percibida por el paciente.

En cuanto a coste-eficacia, como López-Olivo et al ponen de manifiesto en un abstract de la ACR de 2010, el 80% de los estudios financiados por la industria llega a la conclusión de que su intervención es rentable en comparación con el 54% de los estudios financiados por las agencias. En general, todos los tratamientos incluidos en los estudios revisados, aunque excluidos, se pueden considerar coste-efectivos (con ICER dentro o por debajo de 50.000 dólares, incluso después de ajustar por inflación y diferencias en monedas).

## Conclusión

Podemos concluir con un Nivel de Evidencia 1 A que abatacept no parece muy distinto desde el punto de vista de la eficacia a otros biológicos, aunque podría ser menos efectivo que certolizumab a corto plazo y que tocilizumab a largo plazo. Desde el punto de vista de la seguridad, no obstante, sí parece tener un perfil algo mejor que los anti-TNF y tocilizumab.

# Infecciones en pacientes con artritis reumatoide en tratamiento con abatacept

**Revisora:** Chamaida Plasencia Rodríguez

**Supervisora:** Loreto Carmona

## Justificación

Es importante responder esta cuestión para conocer el riesgo de infecciones en general e infecciones graves (hospitalizadas, oportunistas, TBC) en pacientes con artritis reumatoide en tratamiento con abatacept. También se intentará responder si existen diferencias en el riesgo de infecciones en comparación con otros biológicos o FAMES.

## Métodos

Para responder esta cuestión se ha realizado una revisión sistemática para lo cual, la revisora y su supervisora establecieron un protocolo de revisión. Los estudios fueron identificados por las estrategias de búsqueda en las bases de datos bibliográficos principales y resúmenes de congresos europeos y americanos.

Posteriormente la bibliografía encontrada fue exportada a un gestor de referencias bibliográficas, donde se excluyeron los artículos que estaban duplicados.

A continuación, tras la lectura de títulos y *abstract*, se excluyeron los artículos no relacionados con nuestro tema inicial.

En la lectura de las publicaciones se excluyeron aquellas revisiones sistemáticas en las que se utilizó bibliografía que ya habíamos analizado, *abstracts* con artículos publicados posteriormente y revisiones que en la metodología no quedara claro que eran sistemáticas.

Las estrategias de búsqueda utilizadas se realizaron como se muestra en la **Tabla 10**.

**Tabla 10.** Estrategias de búsqueda en las diferentes bases de datos bibliográficas

| **Línea** | **Términos** | **Resultados** |
| --- | --- | --- |
| **Medline (date)** | | |
| 1 | abatacept OR BELATACEPT OR LEA29Y OR BMS224818 OR BMS-224818 OR CTLA-4-Ig OR cytotoxic T lymphocyte-associated antigen 4-immunoglobulin OR CTLA4-Ig immunoconjugate OR CTLA4-Fc OR CTLA4-Ig OR Orencia OR BMS 188667 OR BMS-188667 | 2277 |
| 2 | rheumatoid arthritis or arthritis rheumatoid | 107207 |
| 3 | Infections OR infection OR virus infection OR bacterial infection OR fungal infection OR opportunistic OR opportunistic infection OR opportunistic infections OR tuberculosis OR pulmonary tuberculosis OR mycobacterial infection OR pneumocystis OR pneumocystis jiroveci OR pneumocystis jirocii OR pnemocystis jiroveci pneumonia OR pneumocystis infection OR pneumocystis carini OR varicella OR varicella zoster OR varicella-zoster OR varicella zoster virus OR hepatitis c virus OR hepatitis B virus OR hepatitis b virus OR bacterial infections OR mycoses infections OR parasitic diseases OR virus diseases OR communicable diseases. | 2095400 |
| 4 | (infections OR infection OR virus infection OR bacterial infection OR fungal infection OR opportunistic OR opportunistic infection OR opportunistic infections OR tuberculosis OR pulmonary tuberculosis OR mycobacterial infection OR pneumocystis OR pneumocystis jiroveci OR pneumocystis jirovecii OR pneumocystis jiroveci pneumonia OR pneumocystis infection OR pneumocystis carini OR varicella OR varicella zoster OR varicella-zoster OR varicella zoster virus OR hepatitis c virus OR hepatitis b virus OR hepatitis b virus OR bacterial infections OR mycoses infections OR parasitic diseases OR virus diseases OR communicable diseases) AND (rheumatoid arthritis OR arthritis rheumatoid) AND (abatacept OR belatacept OR LEA29Y OR BMS224818 OR BMS-224818 OR CTLA-4-Ig OR cytotoxic t lymphocyte-associated antigen 4-immunoglobulin OR ctla4-ig immunoconjugate OR CTLA4-Fc OR CTLA4-Ig OR orencia OR BMS 188667 OR BMS-188667) Limits: Humans | 57 |
| 5 | (infections OR infection OR virus infection OR bacterial infection OR fungal infection OR opportunistic OR opportunistic infection OR opportunistic infections OR tuberculosis OR pulmonary tuberculosis OR mycobacterial infection OR pneumocystis OR pneumocystis jiroveci OR pneumocystis jirovecii OR pneumocystis jiroveci pneumonia OR pneumocystis infection OR pneumocystis carini OR varicella OR varicella zoster OR varicella-zoster OR varicella zoster virus OR hepatitis c virus OR hepatitis b virus OR hepatitis b virus OR bacterial infections OR mycoses infections OR parasitic diseases OR virus diseases OR communicable diseases) AND (rheumatoid arthritis OR arthritis rheumatoid) AND (abatacept OR belatacept OR LEA29Y OR BMS224818 OR BMS-224818 OR CTLA-4-Ig OR cytotoxic t lymphocyte-associated antigen 4-immunoglobulin OR ctla4-ig immunoconjugate OR CTLA4-Fc OR CTLA4-Ig OR orencia OR BMS 188667 OR BMS-188667) NOT Case reports Limits: Humans and NOT case report | 52 |
| **Embase (date)** | | |
| 1 | rheumatoid AND ('arthritis'/exp OR arthritis) OR 'arthritis'/exp OR arthritis AND rheumatoid | 133.206 |
| 2 | 'abatacept'/exp OR abatacept OR bms AND 188667 OR 'bms188667'/exp OR bms188667 OR 'ctla4'/exp OR ctla4 AND ('ig'/exp OR ig) OR 'ctla4'/exp OR ctla4 AND ('immunoglobulin'/exp OR immunoglobulin) OR 'ctla4'/exp OR ctla4 AND ('immunoglobulin'/exp OR immunoglobulin) AND g AND orctla4ig OR 'orencia'/exp OR orencia | 2.974 |
| 3 | 'infection'/exp | 2,423,495 |
| 4 | infection OR bacterial infection OR virus infection OR parasitic infection OR pneumocystis pneumonia OR mycosis infection OR tuberculosis OR actinomycetales infection OR varicella zoster virus OR hepatitis c virus OR hepatitis b virus OR opportunistic infection | 2.471.841 |
| 5 | case reports | 1.782.113 |
| 6 | rheumatoid AND 'arthritis'/exp AND [humans]/lim | 96.965 |
| 7 | Combinación de: 1+2+4 | 605 |
| 8 | Combinación 7 excluyendo los Case Reports (5) and limitando humanos | 556 |
| **ACR** | | |
| 1 | Búsqueda proporcionada por Bristol: abatacept+ infecciones + AR | 16 |
| **EULAR** | | |
| 1 | Rheumatoid arthritis and abatacept and infection | 43 |
| 2 | Rheumatoid arthritis and abatacept and tuberculosis | 18 |
| 3 | Rheumatoid arthritis and abatacept and hepatitis b virus | 2 |
| 4 | Rheumatoid arthritis and abatacept and hepatitis c virus | 0 |
| 5 | Rheumatoid arthritis and abatacept and (varicella or zoster or herpes) | 2 |
| 6 | Rheumatoid arthritis and abatacept and opportunistic | 12 |
| 7 | Rheumatoid arthritis and abatacept and pneumocystis | 0 |

En la búsqueda bibliográfica de esta revisión se excluyeron los estudios con las siguientes características: 1) No realizados en humanos, 2) menores de 18 años, 3) patologías que no fueran artritis reumatoide, excluyendo incluso las publicaciones en artritis reumatoide precoz, 4) case reports, 5) Idioma distinto al inglés o español

Los resultados se muestran en tablas de evidencia. Para evaluar la calidad de los estudios se utilizaron las escalas de New-Castle Ottawa y la de toxicidad propuesta por el Cochrane *Handbook*. Los meta-análisis sólo se usaron en los casos en los que las características de los estudios eran homogéneas.

## Resultados

Los resultados de las estrategias de búsqueda están representados en la **Tabla 10**, donde se dividen las búsquedas según lo obtenido en: Pubmed, Embase y *abstracts* de EULAR o ACR. En la **Figura 3** se representa con detalle el total de artículos obtenidos tras la búsqueda y cuántos fueron incluidos finalmente. De un total de 701 publicaciones incluyendo los *abstract*s de ACR y EULAR, fueron revisados con detenimiento 95 publicaciones, de las cuales fueron incluidas finalmente 39. En la **Tabla 11** se describen los artículos que fueron descartados y el motivo de exclusión.

En la **Tabla 12** se resumen las principales características de las 39 publicaciones aceptadas finalmente.

En la **Tabla 13** se recoge el porcentaje de pacientes que desarrollaron diferentes tipos de infecciones en los estudios analizados. Entre las infecciones que se han recogido encontramos: infecciones globales, infecciones graves, infecciones oportunistas, tuberculosis, neumonías graves, hepatitis C, infecciones periprotésicas y sepsis.

En la **Tabla** **14** se exponen las tasas de incidencia de los distintos estudios analizados para diversos tipos de infecciones como: infecciones globales, infecciones oportunistas, infecciones graves, tuberculosis, neumonías graves, infecciones periprotésicas e infecciones hospitalizadas.

El estudio de Singh et al de 2011 ([104](#_ENREF_104)) se muestran las *odds ratio* de infecciones graves con abatacept en comparación con los diferentes biológicos, placebo y grupo control. Estos datos están resumidos en la **Tabla 15**.

Curtis *et al* ([109](#_ENREF_109)) analizan el *hazard ratio* de desarrollar infecciones graves en pacientes tratados con fármacos biológicos y se usa como comparador infliximab. En la **Tabla 16** se muestran estos datos.

**Figura 3**. Artículos revisados en las diferentes estrategias de búsqueda y los resultados tras el proceso de selección


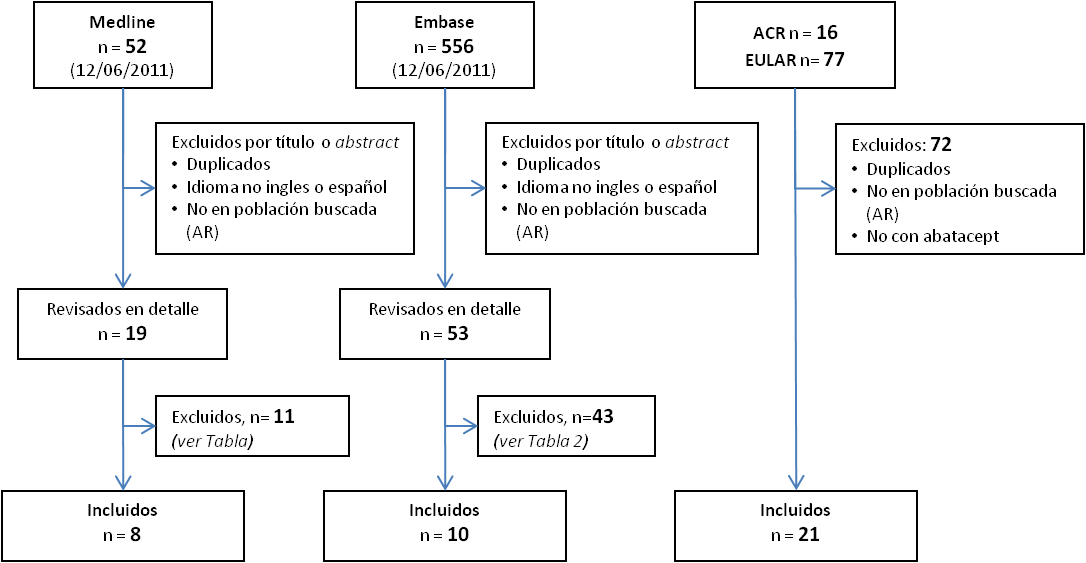


**Tabla 11.** Estudios excluidos y razones de exclusión

| **Autor, año** | **Razón de exclusión** |
| --- | --- |
| Salliot, 2007 | Bibliografía ya analizada |
| Genovese, 2005 | Bibliografía ya usada |
| Horak, 2010 | Bibliografía ya usada |
| Gottenberg, 2010 | Estudio posterior con más pacientes |
| Curtis, 2011 | Bibliografía ya usada |
| Khaishi, 2010 | No sistemática revisión y bibliografía ya usada |
| Koo, 2010 | Revisión no sistemática |
| Korhonen, 2009 | Revisión no sistemática y bibliografía ya usada |
| Schiff, 2007 | Bibliografía ya usada |
| Schiff, 2009 | Bibliografía ya usada |
| Schiff, 2009 | Bibliografía ya usada |
| Schiff, 2010 | Bibliografía ya usada |
| Weinblatt, 2005 | Bibliografía ya usada |
| Westhovens, 2010 | Bibliografía ya usada |
| Westhovens, 2010 | Bibliografía ya usada |
| Ruderman, 2006 | Revisión no sistemática y bibliografía ya usada |
| Simon, 2007 | Bibliografía ya usada |
| Peng, 2007 | Revisión no sistemática |
| Keyser, 2011 | Revisión no sistemática |
| Köller, 2007 | Bibliografía ya usada |
| 2008 | No es un estudio, no se miden tasas de infección |
| Acevedo, 2009 | Revisión no sistemática |
| Genovese, 2009 | Estudio posterior realizado a más tiempo |
| Silva, 2011 | No datos exactos de infección en abatacept |
| Nash, 2011 | No datos numéricos de infecciones con abatacept |
| Genovese 2009 | No da datos exactos de infección para abatacept |
| Titton, 2010 | No da datos exactos de infección para abatacept |
| Khraishi, 2009 | Revisión no sistemática y bibliografía usada |
| Nurmohamed, 2009 | Revisión no sistemática y bibliografía usada |
| Reimold, 2010 | Revisión no sistemática y no da datos de riesgo de infección en abatacept |
| Emery, 2003 | Revisión no sistemática |
| Moreland, 2006 | Revisión no sistemática y bibliografía usada |
| Hervey, 2006 | Revisión no sistemática |
| Kong, 2006 | No datos de infección en pacientes con abatacept |
| Winthrop, 2006 | Es un *case report* |
| Sheth, 2006 | Bibliografía ya usada |
| Vital, 2006 | Revisión no sistemática |
| Gartlehner, 2006 | Bibliografía ya usada |
| Saketkoo, 2006 | No da tasa de infecciones en abatacept |
| Lee, 2006 | Revisión no sistemática |
| Lundquist, 2007 | Bibliografía ya utilizada |
| Todd, 2007 | Revisión no sistemática y bibliografía usada |
| Siddiqui, 2007 | Bibliografía ya usada |
| Lundquist, 2007 | Revisión no sistemática y bibliografía usada |
| Forero, 2007 | Revisión no sistemática |
| Reynolds, 2007 | Revisión no sistemática y bibliografía usada |
| Sibilia, 2007 | Revisión no sistemática |
| Sherrer, 2008 | Bibliografía ya usada |
| Ostor, 2008 | Revisión no sistemática y bibliografía usada |
| Maxwell, 2010 | Bibliografía ya usada |
| Jakko, 2008 | Revisión no sistemática y no datos claros de infección con abatacept |
| Salliot, 2009 | Bibliografía ya usada |
| Martin-Mola, 2009 | Revisión no sistemática |
| Gianniti, 2009 | Revisión no sistemática |
| Taylor, 2009 | Revisión no sistemática |
| Gómez-Centeno, 2009 | Revisión no sistemática |
| Pham, 2009 | Es una guía de práctica clínica, no estudio |
| Schachter, 2009 | Revisión no sistemática |
| Nedel, 2009 | Bibliografía ya usada |
| Lutt, 2009 | Bibliografía ya usada |
| Westhovens, 2009 | Descartado porque trabajo en AR precoz |
| Korkina, 2010 | Revisión no sistemática |
| Maxwell, 2010 | Bibliografía ya usada |
| Turán, 2010 | Revisión no sistemática y bibliografía ya usada |
| Furst, 2010 | Bibliografía ya usada |
| Schiff, 2010 | Revisión no sistemática y bibliografía ya usada |
| Feely, 2010 | Revisión no sistemática |
| Horton, 2010 | Revisión no sistemática |
| Shiff, 2011 | Revisión no sistemática |
| Mealy, 2005 | No localizado |
| Posadas, 2005 | No localizado |
| Yacizi, 2010 | Estudio en AR precoz |

**Tabla 12**. Estudios incluidos.

| **Estudio** | **Participante** | **Intervención** | **Medidas** | **Calidad** | **Escala toxicidad** |
| --- | --- | --- | --- | --- | --- |
| Simon, 2010 ([110](#_ENREF_110))  Estudio comparativo de ensayos y cohortes | 136.707 pacientes AR:  132573 cohortes (62.6% mujeres)  4134 ensayos (80 % Mujeres) | Abatacept | % de infecciones hospitalizadas  % de neumonías hospitalizadas  Tasa de incidencia de TBC, infecciones hospitalizadas y neumonías hospitalizadas | Newcastle-Ottawa Score (NOS) cohortes:  6 ∗ | Escala toxicidad:  4∗ |
| Strangfeld, 2011 ([111](#_ENREF_111))  Estudio de cohorte | 1576 pacientes  AR con FAMEs y/o tratamiento biológico | FAMEs  Fármacos biológicos (anti-TNF, Anakinra, RTX, ABA y Tocilizumab) | % de infecciones periprotésicas en cada grupo  Tasa de incidencia de infecciones periprotésicas en cada grupo | NOS cohortes o series de casos: 5 ∗ | Escala de toxicidad:  4 ∗ |
| Mariette, 2011 ([26](#_ENREF_26))  Revisión de registros de pacientes con Bilógicos (ORA)  Media de segumiento de 8 meses | 682 pacientes AR con ABA  65% con FAMEs concomitantes | ABA | % de infecciones graves  Tasa de incidencia de infecciones graves | NOS cohortes o series de casos: 7 ∗ | Escala de toxicidad:  5 ∗ |
| Schiff, 2010 ([57](#_ENREF_57))  Estudio de cohortes  18 meses de seguimiento | 100 pacientes AR  88% mujeres  60% con FAMES | ABA | % infecciones leves (recurrentes, VHC, influenza-like)  % infecciones graves (neumonías) | NOS cohortes o series de casos: 6 ∗ | Escala de toxicidad:  5 ∗ |
| Storage, 2010 ([112](#_ENREF_112))  Revisión sistemática | 5984 pacientes AR  Tratamiento previo con FAMES y/o anti-TNF  Actividad alta (DAS) | ABA  ABA + FAMES  Control | Nº y % pacientes con infecciones leves, graves, celulitis, abscesos, neumonías, TBC, sepsis y otras | NOS casos y controles:  2 ∗ | Escala de toxicidad:  4 ∗ |
| Westhovens, 2009 ([113](#_ENREF_113))  Estudio de extensión a 5 años | 219 pacientes AR  Características demográficas en referencia 389 | ABA 10 mg | Tasa de incidencia de infecciones e infecciones graves | NOS cohorte:  6 ∗ | Escala de toxicidad:  4 ∗ |
| Kremer, 2008 ([114](#_ENREF_114))  Estudio de extensión a 2 años | 539 pacientes AR  79,4% mujeres  DAS28 basal 6,4 | ABA | Tasa de incidencia de infecciones e infecciones graves | NOS cohortes:  8 ∗ | Escala de toxicidad:  4 ∗ |
| Genovese, 2008 ([115](#_ENREF_115))  Estudio de extensión a 18 meses | 317 pacientes AR  Caracterísiticas demográficas en referencia 441 | ABA | % y tasa de incidencia de infecciones e infecciones graves | NOS cohortes:  8 ∗ | Escala de toxicidad:  6 ∗ |
| Weinblatt, 2007 ([116](#_ENREF_116))  Ensayo clínico (2 partes: 1º año doble ciego y luego estudio de extensión  32 meses | 121 pacientes AR  76% mujeres  100% con Biológicos (ETA) | Doble ciego:  ABA 2mg vs ETA  Estudio extensión:  ABA 10 mg | % de infecciones graves, oportinistas e infecciones del tracto respiratorio superior | Escala de Jadad: 3 puntos (Calidad adecuada) | Escala de toxicidad:  5∗ |
| Weinblatt, 2006 ([117](#_ENREF_117))  Ensayo clínico multicéntrico  Seguimiento 1 año | 1456 pacientes AR  84,4% mujeres  11% con biológicos previos | ABA vs placebo | % de infecciones no graves, infecciones graves (respiratorias, dermatológicas, urinarias, gastrointestinales, ginecológicas y oportunistas) | Escala de Jadad: 3 puntos (Calidad adecuada) | Escala de toxicidad:  6 ∗ |
| Kremer, 2006 ([118](#_ENREF_118))  Ensayo clínico  1 año de duración | 652 pacientes AR con ineficacia a MTX  79,1% mujeres  100% con MTX | ABA vs Placebo | % de infecciones leves e infecciones graves incluyendo TBC | Escala de Jadad: 5 puntos (Alta calidad) | Escala de toxicidad:  6 ∗ |
| Kremer, 2005 ([119](#_ENREF_119))  Ensayo clínico de 1 año de duración | 339 pacientes AR  67,8% mujeres  DAS28: alta actividad (5,7)  100% con MTX | ABA 2mg vs ABA 10 mg vs Placebo | % de infecciones respiratorias de vías altas, criptococosis pulmonar, sepsis e infección de prótesis | Escala de Jadad: 3 puntos (Calidad adecuada) | Escala de toxicidad:  5∗ |
| Singh, 2011 ([104](#_ENREF_104))  Cochrane review  6 ensayos con ABA | 163, ensayos randomizados: 6 con ABA  46 estudios de extensión: 2 con ABA | ABA | OR de infecciones (se realizan comparaciones indirectas de riesgo de infecciones) | NOS cohorte:  6 ∗ | Escala de toxicidad:  5∗ |
| Genovese, 2005 ([120](#_ENREF_120))  Ensayo clínico de 6 meses de duración | 393 pacientes AR  77,6% mujeres  100% anti-TNF previo | ABA vs Placebo | % de infecciones leves e infecciones graves | Escala de Jadad: 5 puntos (Alta calidad) | Escala de toxicidad:  6 ∗ |
| Smitten, 2010 ([121](#_ENREF_121))  Estudio comparativo de ensayos clínicos | 3182 AR: MTX-naive, MTX refractarias y anti-TNF refractarias | ABA | % y tasas de incidencia de infecciones graves, oportunistas, neumonías graves e infecciones hospitalizadas | NOS cohorte:  3 ∗ | Escala de toxicidad:  3 ∗ |
| Smitten, 2010 ([122](#_ENREF_122))  Estudio de ensayos clínicos | 4149 AR pacientes provenientes de 8 ensayos clínicos | ABA | Tasa de incidencia de infecciones graves, hospitalizadas, oportunistas, TBC y otras | NOS cohorte:  3 ∗ | Escala de toxicidad:  3 ∗ |
| Nüslein, 2011 ([123](#_ENREF_123))  Estudio de cohortes con ineficacia previa a anti-TNF  6 meses | 526 pacientes AR: 455 anti-TNF previo  82% mujeres  71,8% con FAMES | ABA | % infecciones graves, abscesos, encefalitis, neumonías, infección de heridas, infecciones urinarias y colangitis | NOS cohorte:  4 ∗ | Escala de toxicidad:  4∗ |
| Gottenberg, 2010 ([66](#_ENREF_66))  Estudio de cohortes  18 meses | 179 pacientes con RTX previo  86,6% anti-TNF previo a RTX  62,6% con FAMES | ABA | % y tasa de incidencia de infecciones graves | NOS cohortes o series de casos: 5 ∗ | Escala de toxicidad:  3 ∗ |
| Becker, 2010 ([124](#_ENREF_124))  Estudio de cohortes | 4149 pacientes: 3256 cumplieron estudio a largo plazo | ABA | Tasa de incidencia de infecciones graves | NOS cohorte:  3 ∗ | Escala de toxicidad:  3 ∗ |
| Gottenberg, 2011 ([125](#_ENREF_125))  Estudio de cohorte con 8 meses de seguimiento | 1000 pacientes AR con ABA: 54 con historia previa de cáncer | ABA | % y tasa de incidencia de infecciones graves en pacientes con cáncer previo | NOS cohortes o series de casos: 5 ∗ | Escala de toxicidad:  4∗ |
| Gottenberg 2009 ([126](#_ENREF_126))  Estudio de cohortes  Duración hasta 7 meses | 364 pacientes AR  75,5% mujeres  94% biológico previo | ABA | % y tasa de incidencia de infecciones graves | NOS cohorte:  6 ∗ | Escala de toxicidad:  3 ∗ |
| Kremer, 2007 ([127](#_ENREF_127))  Estudio de extensión a 5 años | 539 pacientes AR  Características en referencia 355 | ABA | % de TBC  Tasa de incidencia de infecciones e infecciones graves | NOS cohortes o series de casos: 5 ∗ | Escala de toxicidad:  3 ∗ |
| Moreland, 2006 ([128](#_ENREF_128))  Análisis comparativo de ensayos clínicos | 2339 pacientes AR en tratamiento con ABA | ABA | % de infecciones graves | NOS cohortes o series de casos: 2 ∗ | Escala de toxicidad:  3 ∗ |
| Genovese, 2010 ([129](#_ENREF_129))  Ensayo clínico con 6 meses de doble ciego y estudio de extensión (> 5 años) | 322 pacientes AR:  317 estudio doble ciego  218 estudio de extensión | ABA | Tasa de incidencia de infecciones graves | Escala Jadad: pobre calidad .1 punto | Escala de toxicidad:  5∗ |
| Nash, 2010 ([130](#_ENREF_130))  Estudio de cohortes  18 meses | 90 pacientes AR con  100% MTX | ABA sc | % de infecciones: bronconeumonía, diverticulitis, EPI, Neumonía y TBC | NOS cohorte:  3 ∗ | Escala de toxicidad:  3 ∗ |
| Schiff, 2009 ([131](#_ENREF_131))  Ensayo clínico  6 meses de duración | 1049 pacientes AR  81,2% mujeres  100 % con biológico previo | ABA | % de infecciones leves e infecciones graves (neumonía, bronquitis, neumonía lobar) | Escala de Jadad: 2 puntos. Pobre calidad | Escala de toxicidad:  4∗ |
| Schiff 2008 ([101](#_ENREF_101))  Ensayo clínico  1 año de duración | 431 pacientes AR  84% mujeres  con MTX | ABA vs IFX vs Placebo | % de infecciones graves, TBC y otras | Escala de Jadad: 3 puntos (Calidad adecuada) | Escala de toxicidad:  6 ∗ |
| Curtis, 2011 ([109](#_ENREF_109))  Estudio de cohortes con media de seguimiento de 7,7 meses | 7847 indicaciones de biológicos (recogido de base de datos), 6992 pacientes AR totales  76,2% mujeres  37,4% biológico previo | ABA  ADA  ETA  RTX  IFX | % de infecciones graves, oportunistas y otras  Hazard ratio de infecciones | NOS cohortes o series de casos: 7 ∗ | Escala de toxicidad:  6 ∗ |
| Kremer, 2005 ([119](#_ENREF_119))  Ensayo clínico  6 meses | 339 pacientes AR  67,8% mujeres  100% FAMEs | ABA 10 mg vs ABA 2 mg vs Placebo | % de infecciones respiratorias y celulitis | Escala de Jadad: 3 puntos (Calidad adecuada) | Escala de toxicidad:  4∗ |
| Genovese, 2011 ([132](#_ENREF_132))  Ensayo clínico durante 6 meses | 1457 pacientes AR  82,3% mujeres  100% con FAMEs  5,1% con Biolgicos previos | ABA sc vs ABA iv | % de infecciones graves, TBC, oportunistas y otras | Escala de Jadad: 3 puntos (Calidad adecuada) | Escala de toxicidad:  6 ∗ |
| Moreland, 2002 ([133](#_ENREF_133))  Ensayo clínico  169 días | 214 pacientes con AR  75% mujeres  79% con MTX  84% otros FAMEs | CTLA4 ig: 0,5 mg, 2 mg y 10 mg  LEA29Y: 0,5, 2 y 10 mg | % de artritis séptica | Escala de Jadad: 3 puntos (Calidad adecuada) | Escala de toxicidad:  5∗ |
| Rigby, 2011 ([134](#_ENREF_134))  Ensayo clínico abierto de RTX | 176 pacientes AR:  66 con RTX+ Biol+ FAMES  110 con RTX + Biol  88% mujeres | RTX + ABA  RTX + ABA+ FAMES | % de infecciones severas, neumonías y celulitis  Tasa de incidencia de infecciones severas | Escala de Jadad: 0 puntos (pobre calidad) | Escala de toxicidad:  4∗ |
| Smitten, 2008 ([135](#_ENREF_135))  Estudio longitudinal 30,4 meses de media de seguimiento | 4150 pacientes de ensayos clínicos  69007 pacientes de cohortes:  74% mujeres | ABA | Tasas de incidenca y % infecciones hospitalizadas, TBC y oportunistas en ENSAYOS CLÍNICOS  Tasa de incidencia de infecciones hospitalizadas en COHORTES | NOS cohortes o series de casos: 5 ∗ | Escala de toxicidad:  6 ∗ |
| Kremer, 2008 ([136](#_ENREF_136))  Estudio de extensión del AIM  4 años de duración | 594 pacientes AR  77% mujeres  100% con MTX | ABA | Tasa de incidencia de infecciones e infecciones graves | NOS cohortes o series de casos: 7 ∗ | Escala de toxicidad:  4∗ |
| Hochberg, 2010 ([137](#_ENREF_137))  Estudio longitudinal que analiza poblaciones de ensayos clínicos | 4149 pacientes AR  Características demográficas en los ensayos | ABA vs Placebo | Tasa de incidencia y % de infecciones graves e infecciones hospitalizadas | NOS cohortes o series de casos: 6 ∗ | Escala de toxicidad:  5∗ |
| Alten, 2011 ([138](#_ENREF_138))  Estudio de ensayos clínicos en ABA | 6028 pacientes AR:  1879 con ABA sc  4149 con ABA iv | ABA sc vs ABA iv | % de infecciones e infecciones graves  Tasa de incidencia de infecciones, infecciones graves, neumonías, infección urinaria, gastroenteritis, TBC | NOS cohortes o series de casos: 6 ∗ | Escala de toxicidad:  3 ∗ |
| Gottenberg 2010 ([18](#_ENREF_18))  Estudio de cohortes  Media de seguimiento 28 semanas | 920 pacientes AR  79,3% mujeres  62,6% con FAMES | ABA+ FAMES  ABA +FAMES + CT  ABA + CT  ABA | % y tasa de incidencia de infecciones graves | NOS cohortes o series de casos: 7 ∗ | Escala de toxicidad:  3 ∗ |
| Gottenberg, 2011 ([139](#_ENREF_139))  Estudio de cohortes  Duración hasta 2 años | 1031 pacientes con AR  79,1% mujeres  66,6% con FAMES | ABA | % y tasa de infecciones de infecciones graves | NOS cohortes o series de casos: 5 ∗ | Escala de toxicidad:  3 ∗ |

**Tabla 13**. Porcentaje de diferentes tipos de infecciones en pacientes en tratamiento con ABATACEPT

| **Estudio** | **Infecciones en global** | **Infecciones graves** | **Infecciones oportunistas** | **Tuberculosis** | **Neumonías graves** | **Infecciones periprotésicas** | **Hepatitis C** | **Sepsis** |
| --- | --- | --- | --- | --- | --- | --- | --- | --- |
| Simon, 2010 | - | 2,6% | - | - | 0,6% | - | - | - |
| Strangfeld, 2011 | - | - | - | - | - | 0% | - | - |
| Mariette, 2011 | - | 2,3% | - | - | - | - | - | - |
| Schiff, 2010 | - | 0,01% | - | - | 0,01% | - | 0,01% |  |
| Storage, 2010 | - | 3,6% | - | 0,03% | 0,6% | - | - | 0,06% |
| Genovese, 2008 | 73,8% | 7,8% | - | - | - | - | - | - |
| Weinblatt, 2007  ABA 2 mg + biológico  ABA 10 mg + biológico | - | 3,5%  1,2% | 7%  ND | - | - | - | - | - |
| Weinblatt, 2006 | - | 2,9% | 0% | - | - | - | - | - |
| Kremer, 2006 | 53,8% | 2,6% | - | 0,3% | 0,7% | - | - | - |
| Kremer, 2005 | 3,2% | - | 0% | - | - | 0% | - | 0% |
| Genovese, 2005 | 28,3% | 2,3% | - | - | 1,16% | - | - | 0,3% |
| Nüblein, 2011 | - | 1,3% | - | - | 0,2% | - | - | - |
| Gottenberg, 2010 | - | 2,2% | - | - | - | - | - | - |
| Gottenberg, 2011 | - | 7,4% | - | - | - | - | - | - |
| Gottenberg 2009 | - | 2,74% | - | - | - | - | - | - |
| Kremer, 2007 | - | - | - | 0,5% | - | - | - | - |
| Moreland, 2006 | - | 3,8% | - | - | - | - | - | - |
| Nash, 2010 | - | 3,3% | - | 0% | 1,1% | - | - | - |
| Schiff, 2009 | 39,2% | 2,4% | - | - | 0,57% | - | - | - |
| Schiff 2008 | - | 1,92% | 0% | 0% | 1,2% | - | - | 0% |
| Kremer, 2005 | 13,18% | - | - | - | - | - | - | - |
| Genovese, 2011  ABA sc  ABA iv | 31,8%  30,6% | 0,7%  1,4% | 0%  0% | 0%  0% | 0,1%  0,4% | - | - | - |
| Moreland, 2002 | - | 0,54% (artritis séptica) |  |  |  |  |  |  |
| Rigby, 2011 | - | 1,13% | - | - | 0,56% | - | - | - |
| Smitten, 2008 | - | 0,2% | 0,09% | 0,1% | - | - | - | - |
| Hochberg, 2010  ABA corto plazo  ABA largo plazo | - | 5,1%  4,7% |  |  |  |  |  |  |
| Alten, 2011  ABA sc  ABA iv | 53,9%  72,2% | 3,1%  8% | - | - | - | - | - | - |
| Gottenberg 2010 | - | 5,6% | - | - | - | - | - | - |
| Gottenberg, 2011 | - | 6,4% | - | - | - | - | - | - |

**Tabla 14.** Tasa de incidencia (100 pac/año) de diferentes tipos de infecciones en pacientes en tratamiento con ABATACEPT

| **Estudio** | **Infecciones en global** | **Infecciones graves** | **Infecciones oportunistas** | **Tuberculosis** | **Neumonías graves** | **Infecciones periprotésicas** | **Infecciones hospitalizadas** |
| --- | --- | --- | --- | --- | --- | --- | --- |
| Simon, 2010 | - | 3,05 (2,3-4) | - | 0,06 (0,0-5,6) | 0,71 (0,4-1,3) | - | - |
| Strangfeld, 2010 | - | - | - | - | - | 0 (0-63,6) | - |
| Mariette, 2011 | - | 4,5 | - | - | - | - | - |
| Westhovens, 2009 | 77,3 (67,58-87,94) | 3,0 (1,97-4,35) | - | - | - | - | - |
| Kremer, 2008 | 77,6 | 4,3 | - | - | - | - | - |
| Genovese, 2008 | 89,4 | 5 |  |  |  |  |  |
| Smitten, 2010  - ABA mtx naive  - ABA mtx fracaso  - ABA anti-TNF fracaso |  | 1,83 (0,97-3,12)  2,75 (2,28-3,30)  3,90 (3,06-4,89) | 0,28 (0,03-1,01)  0,22 (0,11-0,41)  0,36 (0,14-0,73) |  | 0,84 (0,31-1,82)  0,59 (0,38-0,86)  1,43 (0,95-2,07) |  | 1,55 (0,77-2,76)  2,63 (2,17-3,16)  3,51 (2,72-4,45) |
| Smitten, 2010 |  | 2,87 | 0,36 | 0,06 | 0,71 |  | 2,64 |
| Gottenberg, 2010 | - | 4,6 | - | - | - | - | - |
| Becker, 2010 | - | 2.87 (2,56-3,20) | - | - | - | - | - |
| Gottenberg, 2011 | - | 14,8 | - | - | - | - | - |
| Gottenberg 2009 | - | 5,5 | - | - | - | - | - |
| Kremer, 2007 | 67,1 | 2,8 | - | - | - | - | - |
| Genovese, 2010  ABA corto plazo  ABA largo plazo | - | 5,3  3,4 | - | - | - | - | - |
| Westhovens, 2008 | - | 3,18 | - | - | - | - | - |
| Smitten, 2008 | - | - | 0,01 | 0,06 | - | - | 3,05 |
| Kremer, 2008 | 69 | 3,1 | - | - | - | - | - |
| Hochberg, 2010  ABA corto plazo  ABA largo plazo | - | 3,68 (2,94-4,55)  2,79 (2,46-3,15) | - | - | - | - | 3,33 (2,63-4,16)  2,58 (2,26-2,93) |
| Alten, 2011 | 53,91 (50,69-57,33) | 1,94 (1,50-2,50) | - | 0,03 (0,00-0,23) | 0,36 (0,20-0,65) | - | - |
| Gottenberg 2010 | - | 5,7 | - | - | - | - | - |
| Gottenberg, 2011 | - | 5,6 | - | - | - | - | - |

**Tabla 15**. *Odds Ratio* de infecciones graves en pacientes con abatacept en comparación con los diferentes biológicos, control y placebo. (Estudio del que se extraen estos datos: Singh JA 2011 ([104](#_ENREF_104)))

|  | **Etanercept** | **Infliximab** | **Adalimumab** | **Rituximab** | **Tocilizumab** | **Golimumab** | **Certolizumab** | **Anakinra** |
| --- | --- | --- | --- | --- | --- | --- | --- | --- |
| **Abatacept** | 0,54 (0,26-1,09) | 0,39 (0,20-0,77) | 0,51 (0,24-1,05) | 0,58 (0,29-1,15) | 0,36 (0,15-0,83) | 0,44 (0,19-1,02) | 0,16 (0,06-0,43) | 0,52 (0,20-1,37) |
|  | **Placebo** | **Control** |
| **Abatacept** | 0,57 (0,30-1,08) | 0,57 (0,30-1,08) |

**Tabla 16**. Hazard ratio de infecciones graves en pacientes en tratamiento biológico usando infliximab como grupo comparador. (Estudio del que se extraen los datos: Curtis 2011 ([109](#_ENREF_109)))

|  | **Infliximab** | **Abatacept** | **Adalimumab** | **Rituximab** | **Etanercept** |
| --- | --- | --- | --- | --- | --- |
| **Hazard ratio (infliximab comparador)** | 1,0 | 0,68 (0,48-0,96) | 0,52 (0,39-0,71) | 0,81 (0,55-1,20) | 0,64 (0,49-0,84) |

## Discusión

Al realizar esta búsqueda sistemática, inicialmente encontramos un elevado número de artículos sobre infecciones en pacientes con AR tratados con abatacept, pero tras la lectura de abstract o títulos se pudieron descartar gran parte de ellos porque se trataba de revisiones no sistemáticas, series de casos escasas o estaban escritos en otros idiomas diferentes al inglés y español. La mayoría de los estudios utilizados para el análisis de este estudio han sido ensayos clínicos, estudios de cohortes, revisiones sistemáticas que comparan datos de ensayos y estudios de extensión de ensayos clínicos.

De manera global, la mayoría de los ensayos clínicos analizados en esta revisión tenían calidad adecuada o alta (excepto 2) y se evaluaba de manera adecuada la toxicidad del fármaco. Los estudios de cohortes y casos y controles fueron evaluados como se explicó previamente por la escala de Newcastle-Ottawa. La puntuación (en estrellas) de la gran parte de los estudios se encontraba entre 4-8 estrellas, sólo 5 estudios tenían una puntuación inferior a 4 (4 estudios con 3 estrellas y 1 estudio con 1 estrella).

Singh 2011 ([104](#_ENREF_104)), en un estudio comparativo, observaron que abatacept se asociaba significativamente con un menor riesgo de desarrollar infecciones graves comparada con los otros biológicos. Además también objetivaron que el número de infecciones graves fue menor de manera significativa en el grupo de abatacept cuando se comparaba con infliximab y tocilizumab.

Genovese *et al*. ([140](#_ENREF_140)) realizaron un ensayo clínico para comparar la eficacia y la seguridad de abatacept subcutáneo frente a la administración intravenosa. Observaron que la frecuencia de infecciones fue comparable entre el grupo subcutáneo y el grupo de infecciones y además no se registraron infecciones oportunistas, incluyendo tuberculosis, en ninguno de los dos grupos.

Otro aspecto importante a analizar con respecto a las infecciones en pacientes con abatacept es si éste tratamiento aumenta el riesgo de hospitalizaciones debido a infecciones graves. En un estudio realizado por Simon *et al.* ([110](#_ENREF_110)) objetivaron que las tasas de incidencia de infecciones en global y neumonía que requirieron hospitalización fue similar en los pacientes de ensayos clínicos con abatacept que en las cohortes tratadas con FAMEs no biológicos.

En el estudio ATTEST ([101](#_ENREF_101)) se comparó la eficacia y seguridad de abatacept o infliximab frente a placebo. Con respecto a eficacia no se demostró diferencias significativas. En cambio, se vio un perfil más aceptable de seguridad en los pacientes tratados con abatacept, observando tras un año de tratamiento menos infecciones en este grupo. En el grupo de infliximab se vieron infecciones por gérmenes más atípicos como tuberculosis (peritoneal y pulmonar), herpes zoster y pneumocistis jirovecci, las cuales, no fueron observadas en el grupo de abatacept después de cumplimentar el año de tratamiento.

Otro aspecto a evaluar en esta revisión fue si la terapia combinada de biológicos podría influir sobre el riesgo de infecciones. Weinblatt *et al* ([116](#_ENREF_116)) analizó la seguridad de abatacept en pacientes que recibían de manera concomitante etanercept. Esta asociación no sólo demostró un aumento de los efectos adversos en general, sino también un incremento de infecciones graves.

En la práctica clínica un problema habitual es saber cuándo es más adecuado hacer el cambio a otro fármaco biológico en pacientes en actividad clínica tratados con anti-TNF. Schiff *et al*. ([131](#_ENREF_131)) compararon la seguridad del cambio a abatacept en pacientes refractarios a terapia anti-TNF con periodo de lavado y sin lavado previo (cambio directo), observando que los resultados de seguridad fueron comparables en ambos grupos.

En conclusión, podemos aseverar con un nivel de evidencia alto (Ib) que en los ensayos clínicos las tasas de infecciones con abatacept son similares a las de los pacientes tratados con MTX y numéricamente inferiores a las de otros biológicos.

**Referencias**

1. Ruperto N, Lovell DJ, Quartier P, Paz E, Rubio-Perez N, Silva CA, et al. Abatacept in children with juvenile idiopathic arthritis: a randomised, double-blind, placebo-controlled withdrawal trial. Lancet. 2008;372(9636):383-91. Epub 2008/07/18.

2. Ruperto N, Lovell DJ, Quartier P, Paz E, Rubio-Perez N, Silva CA, et al. Long-term safety and efficacy of abatacept in children with juvenile idiopathic arthritis. Arthritis Rheum. 2010;62(6):1792-802. Epub 2010/03/02.

3. Wells G, Shea B, O'Connell D, Peterson J, Welch V, Losos M, et al. The Newcastle-Ottawa Scale (NOS) for assessing the quality of nonrandomised studies in meta-analyses. 2010 [12/11]; Available from: <http://www.ohri.ca/programs/clinical_epidemiology/oxford.asp>.

4. Rituximab and abatacept for rheumatoid arthritis. Drug Ther Bull. 2008;46(8):57-61. Epub 2008/08/09.

5. Alten R. [Long-term therapy with the selective costimulation modulator CTLA4lg in rheumatoid arthritis]. Z Rheumatol. 2006;65(3):252-3. Epub 2006/03/17. Langzeittherapie mit dem selektiven Costimulationsmodulator CTLA4lg bei rheumatoider Arthritis.

6. Boers M. Abatacept in rheumatoid arthritis: a new branch on the "biologics" tree. Ann Intern Med. 2006;144(12):933-5. Epub 2006/06/21.

7. Butun B. Biologic agents for treatment of rheumatoid arthritis. Anti-Inflammatory Anti-Allergy Agents Med Chem. 2010;9:8-23.

8. Emery P. Abatacept has beneficial effects in rheumatoid arthritis patients with an inadequate response to anti-TNF(alpha) therapy. Clin Exp Rheumatol. 2005;23:767-8.

9. Emery P. Treatment of rheumatoid arthritis. BMJ. 2006;332(7534):152-5. Epub 2006/01/21.

10. Falgarone G, Semerano L, Rulle S, Boissier MC. Targeting lymphocyte activation to treat rheumatoid arthritis. Joint Bone Spine. 2009;76(4):327-32. Epub 2009/06/19.

11. Fan PT, Leong KH. The use of biological agents in the treatment of rheumatoid arthritis. Ann Acad Med Singapore. 2007;36(2):128-34. Epub 2007/03/17.

12. Fernandez J. New agent reduces sign, symptoms of RA. Drug Topics. 2006(150).

13. Finckh A. Comparative effectiveness of rheumatoid arthritis therapies. Curr Rheumatol Rep. 2010;12(5):348-54. Epub 2010/07/24.

14. Graninger W. [Immunomodulatory therapy improves quality of life with rheumatoid arthritis]. Z Rheumatol. 2010;69(3):210-2. Epub 2010/03/24. Die immunmodulierende Therapie verbessert die Lebensqualitat bei rheumatoider Arthritis.

15. Haraoui B. Assessment and management of rheumatoid arthritis. J Rheumatol Suppl. 2009;82:2-10. Epub 2009/06/11.

16. Horak P, Skacelova M, Zurek M. Abatacept and its use in rheumatoid arthritis. Klin Farmakol Farm. 2010;24:103-5.

17. Iking-Konert C. Therapy-refractive rheumatoid arthritis: Effectiveness and reliability of abatecept and infliximab. Aktuel Rheumatol. 2008;33:239-40.

18. Gottenberg JE, Flipo RM, Cantagrel A, Schaeverbeke T, Houvenagel E, Legrand JL, et al. Switching from rituximab to abatacept: tolerance data of 179 patients prospectively followed up in the ''Orencia and Rheumatoid Arthritis'' (ORA) registry. Ann Rheum Dis. 2010;69(Suppl3):385.

19. Keystone EC. Clinical implications of understanding radiographic findings in relation to clinical outcomes in rheumatoid arthritis. J Rheumatol Suppl. 2009;82:11-6. Epub 2009/06/11.

20. Klareskog L, Catrina AI, Paget S. Rheumatoid arthritis. Lancet. 2009;373(9664):659-72. Epub 2009/01/23.

21. Kuek A, Hazleman BL, Ostor AJ. Immune-mediated inflammatory diseases (IMIDs) and biologic therapy: a medical revolution. Postgrad Med J. 2007;83(978):251-60. Epub 2007/04/04.

22. Lipsky P. The convergence of clinical research and clinical care. Nat Rev Rheumatol. 2006;2:113.

23. Lorenz HM. T-cell-activation inhibitors in rheumatoid arthritis. BioDrugs. 2003;17(4):263-70. Epub 2003/08/06.

24. Lu CY. Pharmacoepidemiologic research in Australia: challenges and opportunities for monitoring patients with rheumatic diseases. Clin Rheumatol. 2009;28(4):371-7. Epub 2009/02/05.

25. Malmstrom V, Trollmo C, Klareskog L. Modulating co-stimulation: a rational strategy in the treatment of rheumatoid arthritis? Arthritis Res Ther. 2005;7 Suppl 2:S15-20. Epub 2005/04/19.

26. Mariette X, Gottenberg JE, Ravaud P, Combe B. Registries in rheumatoid arthritis and autoimmune diseases: data from the French registries. Rheumatology (Oxford). 2011;50(1):222-9. Epub 2010/12/15.

27. Martin KA. Spread the word: Arthritis doesn't have to be such pain. Aust J Pharm. 2007;88:42-4.

28. Massarotti EM. FAST4WARD: implications for the clinician. Int J Clin Pract. 2009;63(7):986-8. Epub 2009/07/03.

29. Mikuls TR, O'Dell JR. Physician preference: filling the evidence gap. Arthritis Care Res (Hoboken). 2010;62(1):1-3. Epub 2010/03/02.

30. Moreland L. Curr Rheumatol Rep. 2006;8:367.

31. Nolan M. Abatacept (Orencia) is a novel infusion for the treatment of rheumatoid arthritis: A new strategy in disabling the destructive process brought on by an auto-immune disease. EJHP Pract. 2008;14:85.

32. Oei HB, Hooker RS, Cipher DJ, Reimold A. High rates of stopping or switching biological medications in veterans with rheumatoid arthritis. Clin Exp Rheumatol. 2009;27(6):926-34. Epub 2010/02/13.

33. Pablos Alvarez JL. New therapeutic targets in rheumatoid arthritis. Reumatol Clin. 2006;2:9-12.

34. Paget SA, Moreland LW, Smolen JS, Weyand CM, Russell L. Rheumatoid arthritis: New targeted treatments. J Rheumatol. 2007;34:1-2.

35. Parchamazad P, Ghazvini P, Honeywell M, Treadwell P. Abatacept (CTLA4-Ig, Orencia): An investigational biological compound for the treatment of rheumatoid arthritis. P & T. 2005;30(11):633-40.

36. Posadas A, Lisse J, Sarkar S. Abatacept in the treatment of rheumatoid arthritis. Expert Rev Clin Immunol. 2009;5(1):9-17. Epub 2009/01/01.

37. Prati C, Wendling D. Using targeted therapies alone for rheumatoid arthritis. Joint Bone Spine. 2011;78(1):1-3. Epub 2010/12/03.

38. Ramiro S, Machado P, Singh JA, Landewe RB, Da Silva JAP. Applying science in practice: The optimization of biological therapy in rheumatoid arthritis. Arthritis Res Ther. 2010;12:6.

39. Rendas-Baum R, Wallenstein GV, Koncz T, Kosinski M, Yang M, Bradley J, et al. Evaluating the efficacy of sequential biologic therapies for rheumatoid arthritis patients with an inadequate response to tumor necrosis factor-alpha inhibitors. Arthritis Res Ther. 2011;13(1):R25. Epub 2011/02/18.

40. Russell AS. Relative efficacies: antimalarials to abatacept - the choice is ours. J Rheumatol Suppl. 2009;82:17-24. Epub 2009/06/11.

41. Saito K, Tanaka Y. [Recent topics on new biological agents for treatment of rheumatoid arthritis]. Nippon Naika Gakkai Zasshi. 2008;97(10):2418-23. Epub 2009/01/20.

42. Sfriso P, Salaffi F, Montecucco CM, Bombardieri S, Todesco S. MonitorNet: The Italian multi-centre observational study aimed at estimating the risk/benefit profile of biologic agents in real-world rheumatology practice. Reumatismo. 2009;61:132-9.

43. Sibilia J. [Recombinant proteins or monoclonal antibodies: comparative properties and interest in rheumatoid arthritis]. Med Sci (Paris). 2009;25(12):1033-8. Epub 2009/12/29. Proteine de fusion ou anticorps monoclonal : quel biomedicament choisir dans une maladie inflammatoire ?

44. Siddiqui MA. The efficacy and tolerability of newer biologics in rheumatoid arthritis: best current evidence. Curr Opin Rheumatol. 2007;19(3):308-13. Epub 2007/04/07.

45. Siegel J. Comparative effectiveness of treatments for rheumatoid arthritis. Ann Intern Med. 2008;148(2):162-3. Epub 2008/01/16.

46. Silman AJ. Available therapeutic options following failure of a first anti-TNF agent. Nat Clin Pract Rheumatol. 2009;5(3):115. Epub 2009/03/03.

47. Sokka T, Envalds M, Pincus T. Treatment of rheumatoid arthritis: a global perspective on the use of antirheumatic drugs. Mod Rheumatol. 2008;18(3):228-39. Epub 2008/04/26.

48. Sokka T. Northern highlights in rheumatology. Future Rheumatol. 2008;3:121-6.

49. Strehblow C, Haberhauer G, Fasching P. Comparison of different biologic agents in patients with rheumatoid arthritis after failure of the first biologic therapy. Wien Med Wochenschr. 2010;160(9-10):225-9. Epub 2010/07/16.

50. Taylor PC. Is abatacept an effective treatment for patients with RA who do not respond to other anti-TNF treatments? Nat Clin Pract Rheumatol. 2006;2(3):128-9. Epub 2006/08/26.

51. Tran S, Hooker RS, Cipher DJ, Reimold A. Patterns of biologic agent use in older males with inflammatory diseases: an institution-focused, observational post-marketing study. Drugs Aging. 2009;26(7):607-15. Epub 2009/08/07.

52. van Vollenhoven RF. Unresolved issues in biologic therapy for rheumatoid arthritis. Nat Rev Rheumatol. 2011;7:205-15.

53. Westhovens R, Wollenhaupt J, Bathon J, Haraoui B, Becker JC, Covucci A. Abatacept improves fatigue, activity limitation and quality of life in methotrexate-naïve patients with early RA and poor prognostic factors. Ann Rheum Dis. 2009;68(Suppl 3):577.

54. Wolfe F, Michaud K. The loss of health status in rheumatoid arthritis and the effect of biologic therapy: a longitudinal observational study. Arthritis Res Ther. 2010;12(2):R35. Epub 2010/03/04.

55. Yazici Y, Shi N, John A. Utilization of biologic agents in rheumatoid arthritis in the United States: analysis of prescribing patterns in 16,752 newly diagnosed patients and patients new to biologic therapy. Bull NYU Hosp Jt Dis. 2008;66(2):77-85. Epub 2008/06/10.

56. Leffers HC, Ostergaard M, Glintborg B, Krogh NS, Foged H, Tarp U, et al. Efficacy of abatacept and tocilizumab in patients with rheumatoid arthritis treated in clinical practice: results from the nationwide Danish DANBIO registry. Ann Rheum Dis. 2011. Epub 2011/05/10.

57. Schiff M, Poncet C, Bars ML. Efficacy and safety of abatacept therapy for rheumatoid arthritis in routine clinical practice. Int J Clin Rheumatol. 2010;5(5):581-91.

58. Gibofsky A, Kremer JM, Moniz Reed D, Reed G, Vratsanos G, Greenberg J. Experience with abatacept in a US observational cohort: Clinical and patient-reported outcomes from the CORRONA registry. Ann Rheum Dis. 2009;68(Suppl3):437.

59. Remy A, Gottenberg JE, Lukas C, Cantagrel A, Mariette X, Combe B. Comparison of third line of biologics in rheumatoid arthritis patients previously treated with TNF inhibitors then rituximab: retreatment by TNF inhibitors or treatment by abatacept? Ann Rheum Dis. 2011;70(Suppl3):458.

60. Donato BMK, Hines P, L'Italien G, Bourgault C, Zabransky J, Fanti LM, et al. Retrospective analysis of a Canadian rheumatoid arthritis registry: Improvement in physical function. Ann Rheum Dis. 2009;68(Suppl 3):343.

61. Gottenberg JE, Ravaud P, Bardin T, Cantagrel A, Combe B, Dougados M, et al. Positivity for RF/ANTI-CCP is associated with a better response to abatacept: Data from the "Orencia and Rheumatoid Arthritis" (ORA) registry. Ann Rheum Dis. 2011;70(Suppl 3):74.

62. Harrold L, Reed G, Rosenblatt L, Moniz Reed D, Greenberg J. Comparative effectiveness of abatacept versus anti-TNF agents in the treatment of biologic-naïve rheumatoid arthritis patients, using the CORRONA registry. Ann Rheum Dis. 2011;69(Suppl3):478.

63. Buch M, Saleem B, Das S, Bryer D, Emery P. Abatacept therapy is associated with minimal attrition rate irrespective of rheumatoid factor status in patients with highly resistant rheumatoid arthritis. Ann Rheum Dis. 2010;69(Suppl3):378.

64. Massafra U, Bizzi E, Vacca F, Migliore A. Does the cause of anti-TNF alpha interruption influence the clinical outcome of patients with rheumatoid arthritis treated with abatacept? Ann Rheum Dis. 2010;69(Suppl3):683.

65. Leffers HC, Østergaard M, Glintborg B, Krogh NS, Foged H, Tarp U. Rheumatoid arthritis patients treated in routine care – efficacy of abatacept and tocilizumab based on data from the nationwide Danish Danbio registry. Ann Rheum Dis. 2011;70(Suppl3):463.

66. Gottenberg JE, Ravaud P, Bardin T, Cacoub P, Cantagrel A, Combe B, et al. Prospective follow-up of abatacept treatment in 920 patients with refractory rheumatoid arthritis: Tolerance and efficacy data from the French ORA (Orencia and Rheumatoid Arthritis) registry. Ann Rheum Dis. 2010;69(Suppl3):386.

67. Harrold L, Reed G, Rosenblatt LC, Mody M, Reed DM, Greenberg J. Comparable persistency and effectiveness of abatacept versus anti-TNF agents in the treatment of biologic-nave rheumatoid arthritis patients using the CORRONA registry. Arthritis Rheum. 2010;62(Suppl 10):1794.

68. Alivernini S, Laria A, Gremese E, Zoli A, Ferraccioli G. ACR70-disease activity score remission achievement from switches between all the available biological agents in rheumatoid arthritis: a systematic review of the literature. Arthritis Res Ther. 2009;11(6):R163. Epub 2009/11/06.

69. Audrey P, Nahema I, Thomas B, Christophe R, Thierry S. Clinical and radiological efficacy of biologics in rheumatoid arthritis patients naive or inadequate responders to methotrexate: A metanalysis. Arthritis Rheum. 2010;62(Suppl 10):2267.

70. Barnabe C, Hazlewood G, Barr SG, Martin L. Use of Rituximab or Abatacept after anti-TNF discontinuation in patients with severe rheumatoid arthritis. J Rheumatol. 2009;36(11):2564.

71. Beresniak A, Baerwald C, Zeidler H, Gromnica-Ihle E, Kruger K, Neubauer AS, et al. Cost-effectiveness simulation model of biologic strategies for the treatment of moderate to severe rheumatoid arthritis based on disease activity in Germany. Value Health. 2009;12(7):A440.

72. Beresniak A, Hamuryudan V, Inanc M, Pay S, Yazici H, Ozdedeli S, et al. Sequential cost-effectiveness modelling of different biologic strategies in rheumatoid arthritis in Turkey. Value Health. 2009;12(7):A440.

73. Buch MH. Sequential use of biologic therapy in rheumatoid arthritis. Curr Opin Rheumatol. 2010;22(3):321-9. Epub 2010/03/02.

74. Chauffier K, Salliot C, Berenbaum F, Sellam J. Effect of biotherapies on fatigue in rheumatoid arthritis: a systematic review of the literature and meta-analysis. Rheumatology (Oxford). 2011. Epub 2011/04/26.

75. Emery P, Taylor P, Isaacs JD, Drost P, Dupont D, Beresniak A. Cost-effectiveness of biologic therapeutic sequences for rheumatoid arthritis in the UK. Value Health. 2009;12(7):A439.

76. Furst DE, Keystone EC, Braun J, Breedveld FC, Burmester GR, De Benedetti F, et al. Updated consensus statement on biological agents for the treatment of rheumatic diseases, 2010. Ann Rheum Dis. 2011;70 Suppl 1:i2-36. Epub 2011/02/26.

77. Gartlehner G, Hansen RA, Jonas BL, Thieda P, Lohr KN. The comparative efficacy and safety of biologics for the treatment of rheumatoid arthritis: A systematic review and metaanalysis. J Rheumatol. 2006;33(12):2398-408.

78. Graudal N, Jurgens G. Similar effects of disease-modifying antirheumatic drugs, glucocorticoids, and biologic agents on radiographic progression in rheumatoid arthritis: Meta-analysis of 70 randomized placebo-controlled or drug-controlled studies, including 112 comparisons. Arthritis Rheum. 2010;62(10):2852-63.

79. Hallinen TA, Soini EJ, Eklund K, Puolakka K. Cost-utility of different treatment strategies after the failure of tumour necrosis factor inhibitor in rheumatoid arthritis in the Finnish setting. Rheumatology (Oxford). 2010;49(4):767-77. Epub 2010/01/27.

80. Khraishi M. Comparative overview of safety of the biologics in rheumatoid arthritis. J Rheumatol Suppl. 2009;82:25-32. Epub 2009/06/11.

81. Kristensen LE, Jakobsen AK, Bartels EM, Geborek P, Bliddal H, Saxne T, et al. The number needed to treat for second-generation biologics when treating established rheumatoid arthritis: a systematic quantitative review of randomized controlled trials. Scand J Rheumatol. 2011;40(1):1-7. Epub 2010/10/19.

82. Kuriya B, Arkema EV, Bykerk VP, Keystone EC. Efficacy of initial methotrexate monotherapy versus combination therapy with a biological agent in early rheumatoid arthritis: a meta-analysis of clinical and radiographic remission. Ann Rheum Dis. 2010;69(7):1298-304. Epub 2010/04/28.

83. Kruse GB, Roy S, Cifaldi M, Skonieczny DC, Wong B. Costs associated with administration of intravenous infusion therapy for rheumatoid arthritis. Arthritis Rheum. 2009;60(Suppl 10):1396.

84. Lopez-Olivo MA, Martinez-Lopez JA, Tayar JH, Cueto JP, Pollono EN, Gonzales-Crespo MR, et al. Risk of malignancies in patients with rheumatoid arthritis treated with biologic therapy: Meta-analysis of controlled trials. Arthritis Rheum. 2010;62(Suppl 10):407.

85. Nam JL, Winthrop KL, van Vollenhoven RF, Pavelka K, Valesini G, Hensor EM, et al. Current evidence for the management of rheumatoid arthritis with biological disease-modifying antirheumatic drugs: a systematic literature review informing the EULAR recommendations for the management of RA. Ann Rheum Dis. 2010;69(6):976-86. Epub 2010/05/08.

86. Narayanan SA, Hofeling T, Lisse JR, Vaz BA, Furet O, Alvarez AA, et al. Disease activity differences in patients on dmard therapy: Use of the rheumatology health tracker (RHT) an electronic data capture system to measure patient outcomes. Arthritis Rheum. 2009;60(Suppl 10):319.

87. Pruhs ZM, Harrold LR. Real world utilization of nonbiologic and biologic disease modifying anti-rheumatic drugs in rheumatoid arthritis: A systematic review of the literature. Arthritis Rheum. 2009;60(Suppl 10):1007.

88. Rau R. Efficacy of methotrexate in comparison to biologics in rheumatoid arthritis. Clin Exp Rheumatol. 2010;28(5 Suppl 61):S58-64. Epub 2010/11/26.

89. Rubbert-Roth A, Finckh A. Treatment options in patients with rheumatoid arthritis failing initial TNF inhibitor therapy: a critical review. Arthritis Res Ther. 2009;11 Suppl 1:S1. Epub 2009/04/25.

90. Russell A, Beresniak A, Bessette L, Haraoui B, Rahman P, Thorne C, et al. Cost-effectiveness modeling of abatacept versus other biologic agents in DMARDS and anti-TNF inadequate responders for the management of moderate to severe rheumatoid arthritis. Clin Rheumatol. 2009;28(4):403-12.

91. Salliot C, Dougados M, Gossec L. Risk of serious infections during rituximab, abatacept and anakinra treatments for rheumatoid arthritis: meta-analyses of randomised placebo-controlled trials. Ann Rheum Dis. 2009;68(1):25-32. Epub 2008/01/22.

92. Saraux A, Gossec L, Goupille P, Bregman B, Boccard E, Dupont D, et al. Cost-effectiveness modelling of biological treatment sequences in moderate to severe rheumatoid arthritis in France. Rheumatology (Oxford). 2010;49(4):733-40. Epub 2010/01/19.

93. Schoels M, Wong J, Scott DL, Zink A, Richards P, Landewe R, et al. Economic aspects of treatment options in rheumatoid arthritis: a systematic literature review informing the EULAR recommendations for the management of rheumatoid arthritis. Ann Rheum Dis. 2010;69(6):995-1003. Epub 2010/05/08.

94. Singh JA, Christensen R, Wells GA, Suarez-Almazor ME, Buchbinder R, Lopez-Olivo MA, et al. A network meta-analysis of randomized controlled trials of biologics for rheumatoid arthritis: a Cochrane overview. CMAJ. 2009;181(11):787-96. Epub 2009/11/04.

95. Singh JA, Christensen R, Wells GA, Suarez-Almazor ME, Buchbinder R, Lopez-Olivo MA, et al. Biologics for rheumatoid arthritis: an overview of Cochrane reviews. Sao Paulo Med J. 2010;128(5):309-10. Epub 2010/12/25.

96. Singh JA, Christensen R, Wells GA, Suarez-Almazor ME, Buchbinder R, Lopez-Olivo MA, et al. Biologics for rheumatoid arthritis: an overview of Cochrane reviews. Cochrane Database Syst Rev. 2009(4):CD007848. Epub 2009/10/13.

97. Smolen JS, Landewe R, Breedveld FC, Dougados M, Emery P, Gaujoux-Viala C, et al. EULAR recommendations for the management of rheumatoid arthritis with synthetic and biological disease-modifying antirheumatic drugs. Ann Rheum Dis. 2010;69(6):964-75.

98. Turesson C, Teleman A, Bengtsson A, Sennfalt K, Dupont D, Beresniak A. Sequential pharmacoeconomic model of biologic strategies for rheumatoid arthritis in sweden based on disease activity. Arthritis Rheum. 2009;60(Suppl 10):1003.

99. Venkateshan SP, Sidhu S, Malhotra S, Pandhi P. Efficacy of biologicals in the treatment of rheumatoid arthritis. a meta-analysis. Pharmacology. 2009;83(1):1-9. Epub 2008/10/30.

100. Yuan Y, Trivedi D, Maclean R, Rosenblatt L. Indirect cost-effectiveness analyses of abatacept and rituximab in patients with moderate-to-severe rheumatoid arthritis in the United States. J Med Econ. 2010;13(1):33-41. Epub 2009/12/17.

101. Schiff M, Keiserman M, Codding C, Songcharoen S, Berman A, Nayiager S, et al. Efficacy and safety of abatacept or infliximab vs placebo in ATTEST: a phase III, multi-centre, randomised, double-blind, placebo-controlled study in patients with rheumatoid arthritis and an inadequate response to methotrexate. Ann Rheum Dis. 2008;67(8):1096-103. Epub 2007/12/07.

102. Bucher HC, Guyatt GH, Griffith LE, Walter SD. The results of direct and indirect treatment comparisons in meta-analysis of randomized controlled trials. J Clin Epidemiol. 1997;50(6):683-91. Epub 1997/06/01.

103. Devine EB, Alfonso-Cristancho R, Sullivan SD. Effectiveness of biologic therapies for rheumatoid arthritis: an indirect comparisons approach. Pharmacotherapy. 2011;31(1):39-51. Epub 2010/12/25.

104. Singh JA, Wells GA, Christensen R, Tanjong Ghogomu E, Maxwell L, Macdonald JK, et al. Adverse effects of biologics: a network meta-analysis and Cochrane overview. Cochrane Database Syst Rev. 2011;2:CD008794. Epub 2011/02/18.

105. Bergman GJ, Hochberg MC, Boers M, Wintfeld N, Kielhorn A, Jansen JP. Indirect comparison of tocilizumab and other biologic agents in patients with rheumatoid arthritis and inadequate response to disease-modifying antirheumatic drugs. Semin Arthritis Rheum. 2010;39(6):425-41. Epub 2010/03/13.

106. Malottki K, Barton P, Tsourapas A, Uthman AO, Liu Z, Routh K, et al. Adalimumab, etanercept, infiximab, rituximab and abatacept for the treatment of rheumatoid arthritis after the failure of a tumour necrosis factor inhibitor: A systematic review and economic evaluation. Health Technology Assessment. 2011;15(14):1-300.

107. Salliot C, Finckh A, Katchamart W, Lu Y, Sun Y, Bombardier C, et al. Indirect comparisons of the efficacy of biological antirheumatic agents in rheumatoid arthritis in patients with an inadequate response to conventional disease-modifying antirheumatic drugs or to an anti-tumour necrosis factor agent: a meta-analysis. Ann Rheum Dis. 2011;70(2):266-71. Epub 2010/11/26.

108. Alonso-Ruiz A, Pijoan JI, Ansuategui E, Urkaregi A, Calabozo M, Quintana A. Tumor necrosis factor alpha drugs in rheumatoid arthritis: systematic review and metaanalysis of efficacy and safety. BMC Musculoskelet Disord. 2008;9:52. Epub 2008/04/19.

109. Curtis JR, Xie F, Chen L, Baddley JW, Beukelman T, Saag KG, et al. The comparative risk of serious infections among rheumatoid arthritis patients starting or switching biological agents. Ann Rheum Dis. 2011. Epub 2011/05/19.

110. Simon TA, Askling J, Lacaille D, Franklin J, Wolfe F, Covucci A, et al. Infections requiring hospitalization in the abatacept clinical development program: an epidemiological assessment. Arthritis Res Ther. 2010;12(2):R67. Epub 2010/04/20.

111. Strangfeld A, Eveslage M, Manger B, Bergerhausen HJ, Kapelle A, Listing J, et al. Periprosthetic joint infections in ra patients treated with biologics or conventional DMARDS. Ann Rheum Dis. 2011;70(Suppl 3):411.

112. Storage SS, Agrawal H, Furst DE. Description of the efficacy and safety of three new biologics in the treatment of rheumatoid arthritis. Korean J Intern Med. 2010;25(1):1-17. Epub 2010/03/03.

113. Westhovens R, Kremer JM, Moreland LW, Emery P, Russell AS, Li T, et al. Safety and efficacy of the selective costimulation modulator abatacept in patients with rheumatoid arthritis receiving background methotrexate: a 5-year extended phase IIB study. J Rheumatol. 2009;36(4):736-42. Epub 2009/03/11.

114. Kremer JM, Genant HK, Moreland LW, Russell AS, Emery P, Abud-Mendoza C, et al. Results of a two-year followup study of patients with rheumatoid arthritis who received a combination of abatacept and methotrexate. Arthritis Rheum. 2008;58(4):953-63. Epub 2008/04/03.

115. Genovese MC, Schiff M, Luggen M, Becker JC, Aranda R, Teng J, et al. Efficacy and safety of the selective co-stimulation modulator abatacept following 2 years of treatment in patients with rheumatoid arthritis and an inadequate response to anti-tumour necrosis factor therapy. Ann Rheum Dis. 2008;67(4):547-54. Epub 2007/10/09.

116. Weinblatt M, Schiff M, Goldman A, Kremer J, Luggen M, Li T, et al. Selective costimulation modulation using abatacept in patients with active rheumatoid arthritis while receiving etanercept: a randomised clinical trial. Ann Rheum Dis. 2007;66(2):228-34. Epub 2006/08/29.

117. Weinblatt M, Combe B, Covucci A, Aranda R, Becker JC, Keystone E. Safety of the selective costimulation modulator abatacept in rheumatoid arthritis patients receiving background biologic and nonbiologic disease-modifying antirheumatic drugs: A one-year randomized, placebo-controlled study. Arthritis Rheum. 2006;54(9):2807-16. Epub 2006/09/02.

118. Kremer JM, Genant HK, Moreland LW, Russell AS, Emery P, Abud-Mendoza C, et al. Effects of abatacept in patients with methotrexate-resistant active rheumatoid arthritis: a randomized trial. Ann Intern Med. 2006;144(12):865-76. Epub 2006/06/21.

119. Kremer JM, Dougados M, Emery P, Durez P, Sibilia J, Shergy W, et al. Treatment of rheumatoid arthritis with the selective costimulation modulator abatacept: twelve-month results of a phase iib, double-blind, randomized, placebo-controlled trial. Arthritis Rheum. 2005;52(8):2263-71. Epub 2005/07/30.

120. Genovese MC, Becker JC, Schiff M, Luggen M, Sherrer Y, Kremer J, et al. Abatacept for rheumatoid arthritis refractory to tumor necrosis factor alpha inhibition. N Engl J Med. 2005;353(11):1114-23. Epub 2005/09/16.

121. Smitten AL, Becker DJ, Qi K, Kelly S, Aranda R. Evaluation of the safety profile of abatacept (ABA) by prior therapy in patients with rheumatoid arthritis (RA). Ann Rheum Dis. 2010;69(Suppl3):54.

122. Smitten AL, Westhovens R, Hochberg MC, Torbeyns A, Becker JC, Aranda R. Serious infections and malignancies during long-term exposure to abatacept. Ann Rheum Dis. 2010;69(Suppl3):541.

123. Nüßlein H, Lorenz HM, Alten R, Bensen WG, Bessette L, Burmester G, et al. Efficacy and safety of abatacept treatment for rheumatoid arthritis (RA) in a real-life setting in European and Canadian populations: A 6-month interim analysis of the ACTION study. Ann Rheum Dis. 2011;70(Suppl 3):464.

124. Becker JC, Westhovens R, Hochberg M, Qi K, Kelly S, Smitten A, et al. The long-term safety of abatacept in the treatment of rheumatoid arthritis: Integrated analyses from the abatacept clinical trial program. Ann Rheum Dis. 2010;69(Suppl 3):377.

125. Gottenberg JE, Duzanski MO, Bardin T, Cacoub P, Cantagrel A, Combe B, et al. Short term tolerance of abatacept and rituximab in patients with a history of cancer: Data from the registries AIR and ORA. Ann Rheum Dis. 2011;70(Suppl 3):465.

126. Gottenberg J, Ravaud P, Bardin T, Cacoub P, Cantagrel A, Combe B, et al. Prospective follow-up of abatacept treatment in 364 patients with refractory rheumatoid arthritis: Tolerance and efficacy data from the French ORA (ORENCIA and rheumatoid arthritis) registry. Ann Rheum Dis. 2009;68(Suppl 3):443.

127. Kremer J. Abatacept demonstrates consistent safety and sustained improvements in efficacy through 5 years of treatment in biologic-naïve patients with RA. Arthritis Rheum. 2007;56(Suppl 9):S300.

128. Moreland LW, Combe B, Steinfeld SD, Becker JP, Aranda R, McCann TL, et al. An integrated safety analysis of abatacept in the treatment of rheumatoid arthritis (RA) across patient types and background therapies. Ann Rheum Dis. 2006;65(Suppl II):110.

129. Genovese M, Schiff M, Luggen ME, Le Bars M, Becker JC, Aranda R, et al. Safety, Efficacy and Health-Related Quality of Life (HRQoL) through 5 years of Abatacept (ABA) treatment in patients with Rheumatoid Arthritis (RA) and an Inadequate Response to Anti-Tumour Necrosis Factor (TNF) Therapy. Ann Rheum Dis. 2010;69(Suppl3):385.

130. Nash P, Nayiager S, Genovese MC, Rodriguez C, Delaet I, Elegbe A, et al. Low immunogenicity, consistent safety and sustained clinical efficacy over 18 months of subcutaneous (sc) administration of abatacept (ABA) with and without methotrexate (MTX) in patients with rheumatoid arthritis (RA): Results from a Phase III study. Ann Rheum Dis. 2010;69(Suppl 3):97.

131. Schiff M, Pritchard C, Huffstutter JE, Rodriguez-Valverde V, Durez P, Zhou X, et al. The 6-month safety and efficacy of abatacept in patients with rheumatoid arthritis who underwent a washout after anti-tumour necrosis factor therapy or were directly switched to abatacept: the ARRIVE trial. Ann Rheum Dis. 2009;68(11):1708-14. Epub 2008/12/17.

132. Genovese MC, Covarrubias A, Leon G, Mysler E, Keiserman M, Valente R, et al. Subcutaneous abatacept versus intravenous abatacept: A phase IIIb noninferiority study in patients with an inadequate response to methotrexate. Arthritis Rheum. 2011;63(10):2854-64. Epub 2011/09/29.

133. Moreland LW, Alten R, Van den Bosch F, Appelboom T, Leon M, Emery P, et al. Costimulatory blockade in patients with rheumatoid arthritis: a pilot, dose-finding, double-blind, placebo-controlled clinical trial evaluating CTLA-4Ig and LEA29Y eighty-five days after the first infusion. Arthritis Rheum. 2002;46(6):1470-9. Epub 2002/07/13.

134. Rigby W, Mease P, Olech E, Ashby M, Tole S. An open-label study of the safety of rituximab (RTX) in combination with other biologic disease-modifying antirheumatic drugs (DMARDS) in patients with active rheumatoid arthritis (RA). Ann Rheum Dis. 2011;70(Suppl 3):623.

135. Smitten AL, Covucci A, Simon TA. Descriptive analysis of serious infections, hospitalized infections and malignancies over time in the abatacept clinical development program: A safety update with 10,000 person-years of exposure. Ann Rheum Dis. 2008;67(Suppl II):338.

136. Kremer J, Russell A, Emery P, Abud-Mendoza C, Szechinski J, Zhao C, et al. Safety and Efficacy of Abatacept Over 4 Years of Treatment in Patients with Rheumatoid Arthritis and an Inadequate Response to Methotrexate in the AIM Trial. Arthritis Rheum. 2008;58(Suppl 9):S379.

137. Hochberg MC, Westhovens R, Aranda R, Kelly SM, Khan N, Qi K, et al. Long-Term Safety of Abatacept: Integrated Analysis of Clinical Program Data of up to 7 Years of Treatment. Arthritis Rheum. 2010;62(10 (Suppl)):S164-5.

138. Alten R, Kaine J, Keystone E, Nash P, Delaet I, Qi K, et al. Safety of subcutaneous abatacept in patients with rheumatoid arthritis (RA): integrated analysis of five clinical trials up to 4.5 years. Ann Rheum Dis. 2011;70(Suppl 3):617.

139. Gottenberg JE, Ravaud P, Bardin T, Cantagrel A, Combe B, Dougados M, et al. Prospective follow-up of RA patients (1200 patient/years) treated with abatacept in real life: Results from the ORA registry. Ann Rheum Dis. 2011;70(Suppl 3):466.

140. Genovese M, Covarrubias A, Leon G, Mysler E, Keiserman M, Valente R, et al. Subcutaneous abatacept versus intravenous abatacept: A phase IIIb non-inferiority study in patients with an inadequate response to methotrexate. Arthritis Rheum. 2011. Epub 2011/05/28.
